# Engineered Single-Domain Antibodies with High Protease Resistance and Thermal Stability

Greg Hussack<sup>1,2</sup>, Tomoko Hirama<sup>1</sup>, Wen Ding<sup>1</sup>, Roger MacKenzie<sup>1,3</sup>, Jamshid Tanha<sup>1,2,3\*</sup>

**1** Institute for Biological Sciences, National Research Council Canada, Ottawa, Ontario, Canada, **2** Department of Biochemistry, Microbiology and Immunology, Faculty of Medicine, University of Ottawa, Ottawa, Ontario, Canada, **3** School of Environmental Sciences, University of Guelph, Guelph, Ontario, Canada

## Abstract

The extreme pH and protease-rich environment of the upper gastrointestinal tract is a major obstacle facing orally-administered protein therapeutics, including antibodies. Through protein engineering, several *Clostridium difficile* toxin A-specific heavy chain antibody variable domains (V<sub>H</sub>Hs) were expressed with an additional disulfide bond by introducing Ala/Gly54Cys and Ile78Cys mutations. Mutant antibodies were compared to their wild-type counterparts with respect to expression yield, non-aggregation status, affinity for toxin A, circular dichroism (CD) structural signatures, thermal stability, protease resistance, and toxin A-neutralizing capacity. The mutant V<sub>H</sub>Hs were found to be well expressed, although with lower yields compared to wild-type counterparts, were non-aggregating monomers, retained low nM affinity for toxin A, albeit the majority showed somewhat reduced affinity compared to wild-type counterparts, and were capable of *in vitro* toxin A neutralization in cell-based assays. Far-UV and near-UV CD spectroscopy consistently showed shifts in peak intensity and selective peak minima for wild-type and mutant V<sub>H</sub>H pairs; however, the overall CD profile remained very similar. A significant increase in the thermal unfolding midpoint temperature was observed for all mutants at both neutral and acidic pH. Digestion of the V<sub>H</sub>Hs with the major gastrointestinal proteases, at biologically relevant concentrations, revealed a significant increase in pepsin resistance for all mutants and an increase in chymotrypsin resistance for the majority of mutants. Mutant V<sub>H</sub>H trypsin resistance was similar to that of wild-type V<sub>H</sub>Hs, although the trypsin resistance of one V<sub>H</sub>H mutant was significantly reduced. Therefore, the introduction of a second disulfide bond in the hydrophobic core not only increases V<sub>H</sub>H thermal stability at neutral pH, as previously shown, but also represents a generic strategy to increase V<sub>H</sub>H stability at low pH and impart protease resistance, with only minor perturbations in target binding affinities. These are all desirable characteristics for the design of protein-based oral therapeutics.

**Citation:** Hussack G, Hirama T, Ding W, MacKenzie R, Tanha J (2011) Engineered Single-Domain Antibodies with High Protease Resistance and Thermal Stability. PLoS ONE 6(11): e28218. doi:10.1371/journal.pone.0028218

**Editor:** Anna Mitraki, University of Crete, Greece

**Received:** June 22, 2011; **Accepted:** November 3, 2011; **Published:** November 30, 2011

**Copyright:** © 2011 Hussack et al. This is an open-access article distributed under the terms of the Creative Commons Attribution License, which permits unrestricted use, distribution, and reproduction in any medium, provided the original author and source are credited.

**Funding:** The work was supported by an internal fund from National Research Council Canada. The funder had no role in study design, data collection and analysis, or preparation of the manuscript.

**Competing Interests:** The authors have declared that no competing interests exist.

\* E-mail: Jamshid.Tanha@nrc-cnrc.gc.ca

## Introduction

The gastrointestinal (GI) tract is the site of numerous microbial infections caused by a range of pathogens, including: *Helicobacter pylori*, *Salmonella* Typhi, *Vibrio cholerae*, *Escherichia coli*, *Campylobacter jejuni*, and *C. difficile*. The current approach for treating most of these infections involves administration of antibiotics, which places selection pressure on the organism, can lead to antibiotic resistance, and suppresses or eliminates beneficial commensal microbes. Disease-causing pathogens of the GI tract rely on a myriad of virulence factors for colonization, adherence, motility, cellular entry, and pathogenesis. These include, but are not limited to: surface-layer proteins, adhesins, invasins, flagella, high-molecular weight toxins, and quorum sensing molecules. Inhibition of bacterial virulence factors that are essential for disease pathogenesis therefore represents a novel, non-antibiotic based strategy to treat infectious diseases, while reducing the risk of microbial resistance and maintaining commensal gut populations [1,2,3].

Several approaches are being explored for antivirulence microbial therapy. Inhibition of *E. coli* pilus assembly [4], *Bacillus anthracis* lethal factor [5,6], Type III secretion systems [7,8],

*Staphylococcus aureus* quorum sensing pathways [9], cholera toxin [10] and *C. difficile* toxins A and B [11,12], with small molecules and peptides, are examples currently under development. One of the most pursued antivirulence strategies is targeting bacterial toxins with antibodies. Neutralizing antibodies against anthrax [13], shiga toxin [14], cholera toxin [15], botulinum toxin [16] and *C. difficile* toxins [17,18,19,20,21] have all been successfully isolated and a number of clinical trials involving antibodies to bacterial targets are underway [22]. For human pathogens that secrete toxins into the GI lumen before cellular entry, such as *C. difficile* [23], it may be advantageous to neutralize the toxins within the GI tract. Several studies indicate that oral administration of immunoglobulins (i.e., bovine Ig, human IgA, chicken IgY) may be successful at controlling various GI pathogens, including *C. difficile* [21,24], rotavirus [25], shigella [26], and enterotoxigenic *E. coli* in humans [27] and neonatal pigs [28]. However, there are major limitations facing orally administered immunotherapeutics, including the susceptibility of antibodies to proteolytic degradation, instability at low pH, high dosing requirements and cost [29].

Recombinant antibody fragments, such as single-domain antibodies (sdAbs) [30,31] isolated from conventional IgGs (i.e., V<sub>H</sub>s, V<sub>L</sub>s), from the heavy-chain IgG of *Camelidae* species (i.e.,

V<sub>H</sub>Hs) and from cartilaginous shark Ig<sub>NARS</sub> (i.e., V<sub>NARS</sub>), are ideal agents to explore for oral immunotherapy [32] because of their small size (12 kDa–15 kDa), high affinity, high protease and thermal stability, high expression, amenability to library selection under denaturing conditions for isolating superstable species and ease of genetic manipulation. Despite possessing relatively high intrinsic protease and pH stability, a limited number of studies have shown that, when administered orally, sdAbs are readily degraded in the low pH pepsin-rich environment of the stomach and by digestive enzymes in the duodenum [33,34,35]. Several engineering and selection-based approaches have been undertaken to improve the thermal stability and protease resistance of sdAbs and other recombinant antibody fragments (i.e., scFvs and Fabs). Engineered disulfide bonds [36,37,38,39] and other stabilizing mutations [40] have increased the thermal stability of various recombinant fragments. Library selection of antibodies in the presence of proteases, denaturants, extreme pH, and elevated temperatures has led to the isolation of antibody fragments with favorable characteristics such as improved thermal and chemical stability, increased protease resistance, and resistance to aggregation [41,42,43,44,45,46,47,48]. Random mutagenesis approaches have been used to increase the proteolytic stability of V<sub>H</sub>Hs [49]. There has been no universal strategy to increase recombinant antibody thermal and protease stability simultaneously.

In this work, we hypothesized the addition of a non-canonical disulfide bond into the hydrophobic core of llama V<sub>H</sub>Hs between framework region 2 (FR2) and FR3 would not only increase thermal stability at neutral pH, as previously reported [37,38,50], but would also impart resistance to proteolytic degradation and increase antibody stability at low pH. To test this hypothesis, we introduced two cysteine residues into a panel of V<sub>H</sub>Hs which neutralize *C. difficile* toxin A (TcdA) [20]. Then, the mutant V<sub>H</sub>Hs were compared to the wild-type V<sub>H</sub>H counterparts with respect to expression yield, tendency for aggregation, antigen binding affinity, CD structural signatures, thermal stability at neutral and acidic pH, susceptibility to GI proteases, and toxin-neutralization capacity.

## Methods

### Chemicals, Reagents, and Cell Lines

All chemicals used in this study were of analytical grade supplied by various companies. Oligonucleotides were synthesized by Operon (Huntsville, AL). The vectors pSJF2H [51] or pMED2 (a modified version of pSJF2H containing *Sfi*I cloning sites) were used for all V<sub>H</sub>H expression in *E. coli* cells (strain TG1) supplied by Stratagene (La Jolla, CA).

### Cloning, Expression, and Purification of V<sub>H</sub>H Mutants

The nomenclature used throughout this work to distinguish between wild-type and mutant V<sub>H</sub>Hs is exemplified as follows: “A4.2” denotes a wild-type V<sub>H</sub>H, “A4.2m” denotes a mutant V<sub>H</sub>H. To construct mutant V<sub>H</sub>Hs with a second disulfide bond, splice-overlap extension-polymerase chain reaction (SOE-PCR) [52] was performed using 4 primers for each V<sub>H</sub>H (Table S1) and two rounds of PCR essentially as described [53]. Ala or Gly and Ile codons at positions 54 and 78 (IMGT numbering system; <http://imgt.cines.fr/>), respectively, were changed to Cys codons through primer-forced mutation. In the first PCR, two mutagenized overlapping sub-fragments were generated for each V<sub>H</sub>H. The primer pairs used for each V<sub>H</sub>H were as follows: A4.2m (BbsI-VHH and A4.2mR-Cys, A4.2mF-Cys and BamHI-VHH); A5.1m (BbsI-VHH and A5.1mRCys, A4.2mFCys and BamHI-VHH); A19.2m (BbsI-VHH and A19.2mR-Cys, A19.2mF-Cys and

BamHI-VHH); A20.1m (A20.1mSfiI-F and A20.1mR-Cys, A20.1mF-Cys and A20.1mSfiI-R); A24.1m (A20.1mSfiI-F and A24.1mR-Cys, A24.1mF-Cys and A20.1mSfiI-R); A26.8m (BbsI-VHH and A26.8mR-Cys, A26.8mF-Cys and BamHI-VHH). Each sub-fragment was gel purified and spliced with its partner fragment in a second PCR. Briefly, 160 ng of each sub-fragment were added to a 50 μL PCR mixture containing *Pfu* DNA polymerase, dNTPs and reaction buffer. The reaction was placed in a thermal cycler and the two fragments were spliced together using a program consisting of a preheating step at 94°C for 5 min and 10 cycles of 94°C for 30 s, 55°C for 30 s, and 72°C for 1 min. To amplify the spliced products, the reaction was heated to 94°C for 3 min, 5 pmol (0.5 μL) of each primer pair was added (BbsI-VHH and BamHI-VHH for A4.2m, A5.1m, A19.2m, and A26.8m; A20.1mSfiI-F and A20.1mSfiI-R for A20.1m and A24.1m), and 35 PCR cycles were performed exactly as described above. The resulting fragments were gel purified, digested with *Bbs*I and *Bam*HI (A4.2m, A5.1m, A19.2m, and A26.8) or *Sfi*I (A20.1m and A24.1m) restriction enzymes, ligated into similarly digested expression vectors (pSJF2H or pMED2), and transformed into TG1 *E. coli* for V<sub>H</sub>H expression. Positive colonies were identified by colony-PCR and DNA sequencing, using the M13RP and M13FP primers (Table S1).

Mutant V<sub>H</sub>Hs were expressed in the same vector as wild-type V<sub>H</sub>Hs [20]. Expression and purification of wild-type and mutant V<sub>H</sub>Hs were performed as described [20], followed by dialysis into phosphate-buffered saline pH 7.3 (PBS), into distilled, deionized water (ddH<sub>2</sub>O) for mass spectrometry (MS) analysis, or into 10 mM sodium phosphate buffer pH 7.3 for CD experiments.

### MS Analysis

Proteolytic peptide fragments of mutant V<sub>H</sub>Hs were created by digestion with cyanogen bromide (CNBr) and trypsin. Briefly, 100 μL reactions containing 50 μg of mutant V<sub>H</sub>H (diluted in PBS), 10 μL of 1 M HCl and 40 μL of CNBr (10 mg/mL stock prepared in 1 M HCl) were digested for 14 h at ambient temperature in the dark. The next day, 100 μL of 1 M Tris-HCl, pH 8.6, and 60 μL of trypsin (100 μg/mL stock; sequencing grade, Roche, Mississauga, ON, Canada) were added directly to the CNBr reaction mixture and incubated for 2 h at 37°C. Samples were then analyzed by non-reducing SDS-PAGE to ensure digestion prior to MS analysis. Nano-flow reversed-phase HPLC MS (nanoRPLC-ESI-MS) with data dependent analysis (DDA) was performed to confirm disulfide bond formation in the mutant V<sub>H</sub>Hs. An aliquot of the CNBr/trypsin digested V<sub>H</sub>Hs was re-suspended in 0.1% formic acid (aq) and analyzed by nanoRPLC-ESI-MS using a nanoAcquity UPLC system coupled to a Q-TOF Ultima<sup>TM</sup> hybrid quadrupole/TOF mass spectrometer (Waters). The peptides were first loaded onto a 180 μm I.D. ×20 mm 5 μm Symmetry<sup>®</sup>C18 trap (Waters), then eluted to a 100 μm I.D. ×10 cm 1.7 μm BEH130C18 column (Waters) using a linear gradient from 0% to 36% solvent B (acetonitrile + 0.1% formic acid) in 36 min, 36%–90% solvent B for 2 min. Solvent A was 0.1% formic acid in water. The peptide MS<sup>2</sup> spectra were searched against mutant V<sub>H</sub>H protein sequences using the Mascot<sup>TM</sup> database searching algorithm (Matrix Science, London, UK). The MS<sup>2</sup> spectra of the disulfide-linked peptides were deconvoluted using the MaxEnt 3 program (Waters) for *de novo* sequencing to determine the exact disulfide-linked positions.

### Size Exclusion Chromatography and Affinity Measurements

Mutant V<sub>H</sub>Hs were passed over a Superdex<sup>TM</sup> 75 (GE Healthcare, Baie-d’Urfé, QC, Canada) size exclusion chromatog-

raphy column as described [20] to determine their aggregation state. Briefly, V<sub>HH</sub>s were applied at concentrations ranging from 0.75–1 mg/mL ( $\approx$ 45–60  $\mu$ M) with a flow rate of 0.5 mL/min in a mobile phase that consisted of HBS-EP running buffer (10 mM HEPES, pH 7.4, 150 mM NaCl, 3 mM EDTA, and 0.005% (v/v) P20 surfactant). The collected fractions from the Superdex<sup>TM</sup> 75 column were then used directly for surface plasmon resonance (SPR) analysis. All kinetic rate and equilibrium constants were determined as described [20] using a Biacore 3000 instrument (GE Healthcare) and 10,287 resonance units (RUs) of immobilized TcdA. In addition, the dissociation rate constants ( $k_{\text{off}}$ ) of mutant V<sub>HH</sub>s before and after digestion with pepsin were compared by SPR (*see below*).

## CD Spectroscopy

Wild-type and mutant V<sub>HH</sub>s were analyzed by CD spectroscopy using a Jasco J-815 spectropolarimeter (Jasco, Easton, MD) at pH 7.3 (10 mM sodium phosphate buffer) and at pH 2.0 (10 mM sodium phosphate buffer+50 mM HCl). For all CD experiments performed at pH 2.0, proteins were equilibrated in the above buffer for a minimum of 2 h before scanning. The 50 mM Cl<sup>-</sup> concentration did contribute to a minor amount of light scatter at wavelengths less than 200 nm. For far-UV CD secondary structure scans and thermal unfolding experiments a 5 mm cuvette containing 1.5 mL of V<sub>HH</sub> at 50  $\mu$ g/mL (3.2  $\mu$ M;  $A_{280} \approx 0.1$ ) was used. V<sub>HH</sub> concentrations of up to 10  $\mu$ M were initially tested, but signal intensities, expressed in molar ellipticity, were identical to that of 3.2  $\mu$ M V<sub>HH</sub> concentrations and this concentration also avoided generating compromising signals from protein aggregates formed at high temperatures in thermal unfolding experiments. In these experiments, 4 accumulations were collected for each sample between 190 nm–250 nm with a 1 mm bandwidth, 20 nm/min scan speed and 0.5 nm data pitch. Raw ellipticity data, given in millidegrees (mdeg), was smoothed using the Jasco software, exported, and converted to molar ellipticity,  $[\theta]$ . To convert from mdeg to molar ellipticity ( $[\theta]$ ) in deg cm<sup>2</sup>/dmol, Equation 1 [54] was used,

$$[\theta] = (m \text{ deg} \times MRW) \div (\text{pathlength} \times [V_{HH}]) \quad (1)$$

where the mean residue weight, MRW = (molecular weight of the antibody in Da/number of backbone amino acids), pathlength = cell pathlength in mm, and  $[V_{HH}]$  = concentration of V<sub>HH</sub> in mg/mL. Thermal unfolding was followed at 215 nm with CD measurements taken every 2°C from 30°C to 96°C with a temperature increase of 1°C/min. It should be noted that 0.5°C and 1°C temperature interval measurements, on a select test V<sub>HH</sub>, gave nearly identical  $T_m$  values to 2°C intervals. Molar ellipticity ( $[\theta]$ ) was used to calculate the fraction of protein folded (FF), which is shown in Equation 2 [55],

$$FF = ([\theta] - [\theta_U]) \div ([\theta_F] - [\theta_U]) \quad (2)$$

where  $[\theta_F]$  and  $[\theta_U]$  is the molar ellipticity of the folded (30°C) and unfolded (96°C) states, respectively. The thermal unfolding midpoint temperature ( $T_m$ ) was obtained by plotting FF against temperature ( $T$ ) and fitting with a sigmoidal Boltzmann function in GraphPad Prism (GraphPad Software, La Jolla, CA). We assumed a temperature of 30°C represented a fully folded V<sub>HH</sub> (FF = 1.0) and a temperature of 96°C represented a fully unfolded V<sub>HH</sub> (FF = 0). In the case of some V<sub>HH</sub>s with a limited number of lower baseline data points, our  $T_m$  values are minimum estimates. We followed unfolding at 215 nm because of a large difference in ellipticity between folded and unfolded states at this wavelength and because of very low light scattering in samples measured at neutral and

acidic pH. A single  $T_m$  replicate for each V<sub>HH</sub> was collected because of the very small standard error in CD-determined  $T_m$  values. For example, a number of previous V<sub>HH</sub>  $T_m$  replicates in our lab, using identical conditions, produced a standard error ranging from  $\pm 0.03\%$ – $0.63\%$  with an average error of  $\pm 0.33\%$ .

To compare the tertiary structures of wild-type and mutant V<sub>HH</sub>s at neutral and acidic pH, near-UV CD experiments were performed in the range of 250 nm–340 nm using the conditions described above with the exception of a 10 mm cuvette containing 2 mL of protein at 250  $\mu$ g/mL. In all cases, the ellipticity of buffer blanks were subtracted from experimental values and the reported data is the average of two independent experiments with 4 data accumulations in each.

## Protease Digestion Assays

The sensitivity of wild-type and mutant V<sub>HH</sub>s to the three major GI proteases pepsin, trypsin, and chymotrypsin was explored. All reactions were performed in 20  $\mu$ L volumes with 4.8  $\mu$ g of V<sub>HH</sub> diluted in PBS. For pepsin digestions, reactions contained 17  $\mu$ L of V<sub>HH</sub>, 2  $\mu$ L of porcine stomach pepsin (460 U/mg; Sigma, Mississauga, ON, Canada), and 1  $\mu$ L of 1 M HCl (final pH: 2.0). Final pepsin concentrations in each reaction ranged from 0.1  $\mu$ g/mL to 100  $\mu$ g/mL. Digestions were incubated at 37°C for 1 h and neutralized with 1  $\mu$ L of 1 M NaOH. For trypsin and chymotrypsin digestions, reactions contained 18  $\mu$ L of V<sub>HH</sub> (diluted in PBS supplemented with 10 mM CaCl<sub>2</sub>) and 2  $\mu$ L of either trypsin or chymotrypsin (sequencing grade, Roche). Final trypsin/chymotrypsin concentrations ranged from 0.1  $\mu$ g/mL to 100  $\mu$ g/mL. Digestions were incubated at 37°C for 1 h and neutralized with 1  $\mu$ L of protease inhibitor cocktail (Sigma). All neutralized V<sub>HH</sub>-protease reactions and controls (V<sub>HH</sub>s with no protease) were separated by SDS-PAGE, stained with Coomassie and photographed using an AlphaImager3400 (Alpha Innotech Corporation, San Leandro, CA). To determine the percent of V<sub>HH</sub> retained after protease digestions, densitometry analysis was performed using the AlphaEaseFc software package (Version 7.0.1, Alpha Innotech Corporation) on control and digested V<sub>HH</sub>s. A total of three independent digestion reactions were performed on all of the V<sub>HH</sub>s at each protease concentration and replicate digestions were run on separate SDS-PAGE gels. Digestions at the highest protease concentration (100  $\mu$ g/mL) that were not analyzed by SDS-PAGE were buffer exchanged into ddH<sub>2</sub>O using Millipore Biomax 5K MWCO spin columns (Millipore, Billerica, MA) and subjected to MS analysis to identify the cleavage products, or analyzed by SPR for TcdA binding activity.

## Toxin Neutralization Assay

*In vitro* TcdA neutralization assays were performed essentially as described [20]. Human lung fibroblast cell rounding was reported 24 h post addition of TcdA (100 ng/mL), TcdA+wild-type V<sub>HH</sub> (1000 nM) or TcdA+mutant V<sub>HH</sub> (1000 nM). Specifically, V<sub>HH</sub>s were added as pooled mixtures of A4.2, A5.1, A20.1, and A26.8 (250 nM each, 1000 nM total) or A4.2m, A5.1m, A20.1m, and A26.8m (250 nM each, 1000 nM total). The percentage of cell rounding was scored visually using light microscopy and the reported values are the average of two independent experiments in which each V<sub>HH</sub> mixture was tested in triplicate.

## Homology Modeling

The SWISS-MODEL online workspace (<http://swissmodel.expasy.org/workspace/>) [56] was used to construct homology models of A4.2 (wild-type) and A4.2m (mutant) V<sub>HH</sub>s. The 1qd0A (PDB) V<sub>HH</sub> was used as a template [57], sharing 73.5% and

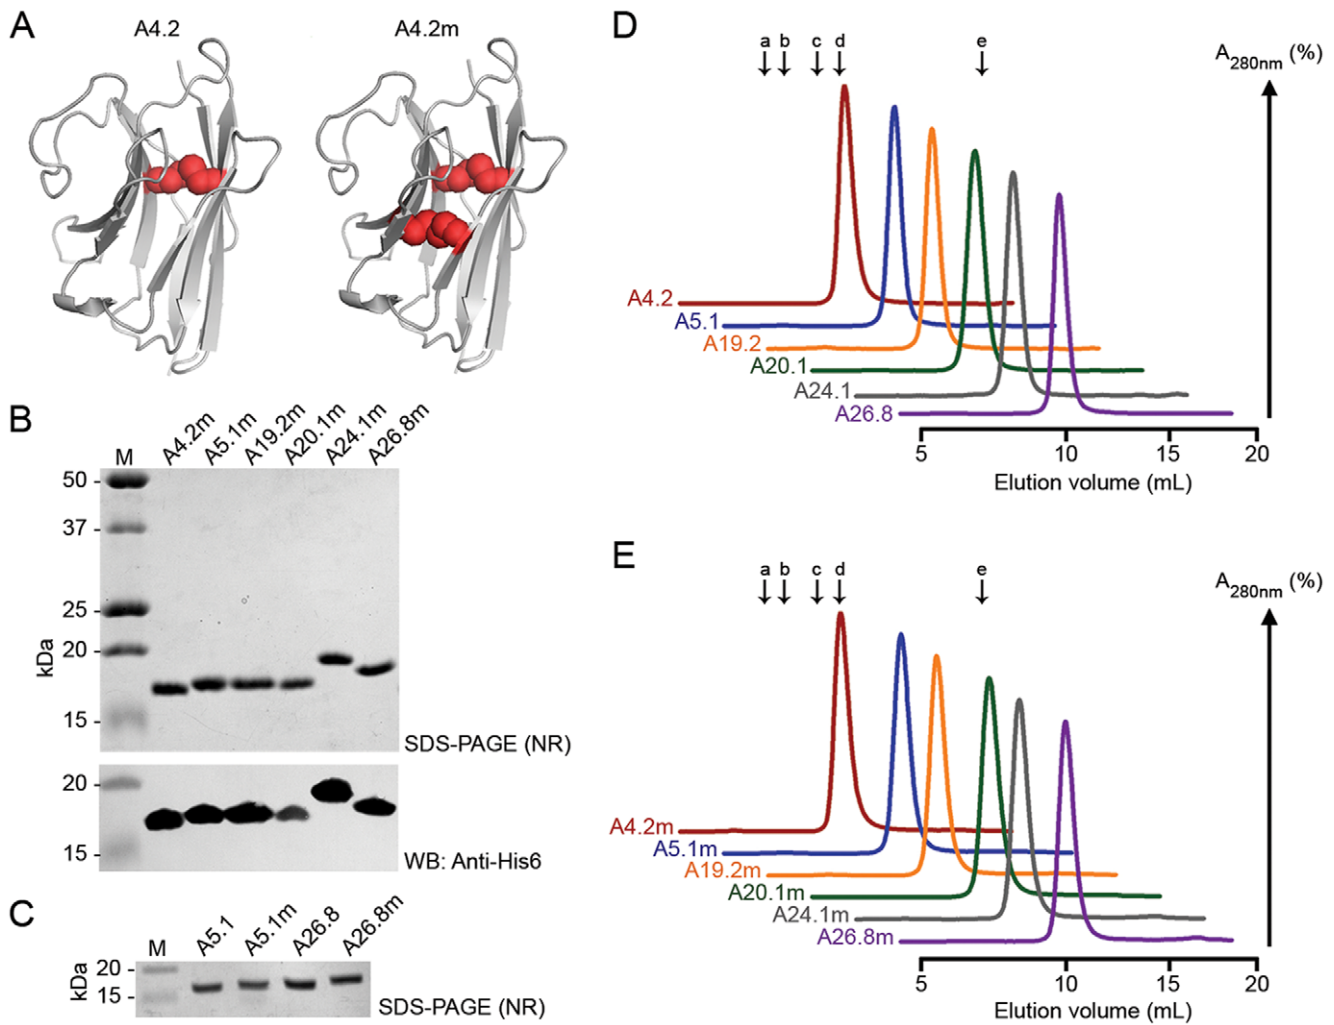

**Figure 1. Design, purification, and size exclusion chromatography profiles of disulfide bond mutant V<sub>H</sub>Hs.** (A) Representative homology models of A4.2 and A4.2m were built on the PDB template 1qd0A V<sub>H</sub>H [57], sharing 73.5% and 71.8% homology, respectively. Disulfide bonds are shown as colored spheres in the hydrophobic core of the V<sub>H</sub>H domains. (B) Non-reducing (NR) SDS-PAGE analysis and Western blot (WB) probed with an anti-His<sub>6</sub> IgG on IMAC-purified mutant V<sub>H</sub>Hs. M: molecular weight marker in kDa. (C) Representative SDS-PAGE analysis showing mutant V<sub>H</sub>Hs run slower than the corresponding wild-type V<sub>H</sub>Hs under non-reducing conditions. (D, E) Size exclusion chromatography (SEC) analysis of wild-type and mutant V<sub>H</sub>Hs revealed similar size exclusion profiles, indicating the second disulfide bond does not promote the formation of interdomain disulfide-bonds or multimeric mutant V<sub>H</sub>Hs. The elution volumes ( $V_e$ s) of SEC molecular weight standards are shown with arrows and are aligned relative to the A4.2 and A4.2m chromatograms. a: ovalbumin (MW=43.0 kDa,  $V_e$ =8.90 mL); b: carbonic anhydrase (MW=30.0 kDa,  $V_e$ =9.71 mL); c: trypsin inhibitor (MW=20.1 kDa,  $V_e$ =11.06 mL); d:  $\alpha$ -lactalbumin (MW=14.4 kDa,  $V_e$ =11.97 mL); e: vitamin B (MW=1.3 kDa,  $V_e$ =18.7 mL). The equation of the line of a standard curve generated from these standards was  $LOG_{10} MW = -0.1539V_e + 2.9949$  ( $r^2 = 0.9995$ ). From this equation the V<sub>H</sub>H apparent MWs ranged from 9.8 kDa–13.6 kDa, indicating monomeric V<sub>H</sub>Hs. doi:10.1371/journal.pone.0028218.g001

71.8% homology, respectively. Images of the modeled V<sub>H</sub>Hs were generated using PyMOL (www.pymol.org).

## Results

### Expression and Purification of Mutant V<sub>H</sub>Hs

Previously, a unique dromedary “V<sub>H</sub>H” was isolated that possessed a naturally occurring disulfide bond between Cys54 and Cys78 residues [58]. When incorporated into several “wild-type” V<sub>H</sub>Hs which possessed only the conserved Cys23/Cys104 disulfide bond, the Cys54/Cys78 disulfide bond increased V<sub>H</sub>H thermal and chemical stabilities [37,38]. To examine the stabilizing effects of an engineered disulfide bond on llama-derived V<sub>H</sub>Hs, we followed this strategy and chose to introduce two cysteine residues into the hydrophobic core of six *C. difficile* TcdA-specific V<sub>H</sub>Hs

[20] by incorporating Ala/Gly54Cys and Ile78Cys point mutations (Fig. 1A, Fig. S1), creating V<sub>H</sub>Hs with two disulfide bonds. Soluble V<sub>H</sub>Hs were extracted from the periplasm of TG1 *E. coli* and purified by immobilized-metal affinity chromatography (IMAC) with purified yields ranging from 3–12 mg/L of bacterial culture. Non-reducing SDS-PAGE and Western blot analysis of the purified products revealed the mutant V<sub>H</sub>Hs were of high purity and did not form interdomain disulfide bonds (Fig. 1B). On non-reducing SDS-PAGE gels, mutant V<sub>H</sub>Hs consistently ran slower than their corresponding wild-type V<sub>H</sub>Hs (Fig. 1C).

### MS Analysis

The molecular weights of all mutant V<sub>H</sub>Hs were determined, but were not accurate enough to confirm the formation of the engineered disulfide bond. To precisely confirm the presence of

the introduced disulfide bond, mutant V<sub>H</sub>Hs were digested with CNBr and trypsin (Fig. 2A, B) and their digests subjected to MS<sup>2</sup> analysis. The identification coverage of the mutant V<sub>H</sub>Hs from the analysis of their CNBr/trypsin digests using nanoRPLC-ESI-MS with DDA was more than 30%. The disulfide-linked peptide ions appeared prominent in the survey scan of the DDA experiment when the proteins were digested with a combination of CNBr and trypsin. Peptide fragments linked by the engineered Cys<sup>54</sup>-Cys<sup>78</sup> disulfide bond (shown in blue text in Fig. S1) were positively identified for all mutant V<sub>H</sub>Hs by manual de-novo sequencing (Table 1). For example, the protein sequence coverage of A5.1m was 43% and a prominent ion at m/z 526.25 (3+) was sequenced as a disulfide-linked peptide EFVCVITR (P1) and FTCSR (P2) as shown (Fig. 2C, Fig. S1, Table 1). An almost complete disulfide-linked y fragment ion series was observed from one peptide with the other peptide attached as a modification via a disulfide bond, which remains intact under collision induced dissociation (CID) [59].

## Size Exclusion Chromatography and Affinity Measurements

Analysis of mutant V<sub>H</sub>Hs on a Superdex<sup>TM</sup> 75 size exclusion chromatography column produced single, monomeric peaks nearly identical to the profile for wild-type V<sub>H</sub>Hs (Fig. 1D, E), confirming the mutant V<sub>H</sub>Hs are non-aggregating. SPR analysis revealed the specific and high-affinity binding of 4 of 6 mutant V<sub>H</sub>Hs to TcdA (Fig. 3, Table 2). These four were also the strongest TcdA neutralizers. Two mutants (A19.2m and A24.1m) exhibited non-specific binding to reference cell proteins and as a result specific interaction data could not be generated, even at antibody concentrations as high as 3.2 μM. When compared to their wild-type counterparts, the *K*<sub>DS</sub> of 3 TcdA-binding mutants were reduced approximately 2–6 fold (Table 2), while the affinity of one V<sub>H</sub>H was relatively unchanged (*K*<sub>DS</sub> of 24 nM and 20 nM for A4.2 and A4.2m, respectively). The *K*<sub>D</sub> reductions were largely a result of faster *k*<sub>off</sub> values and to a much lesser extent influenced by

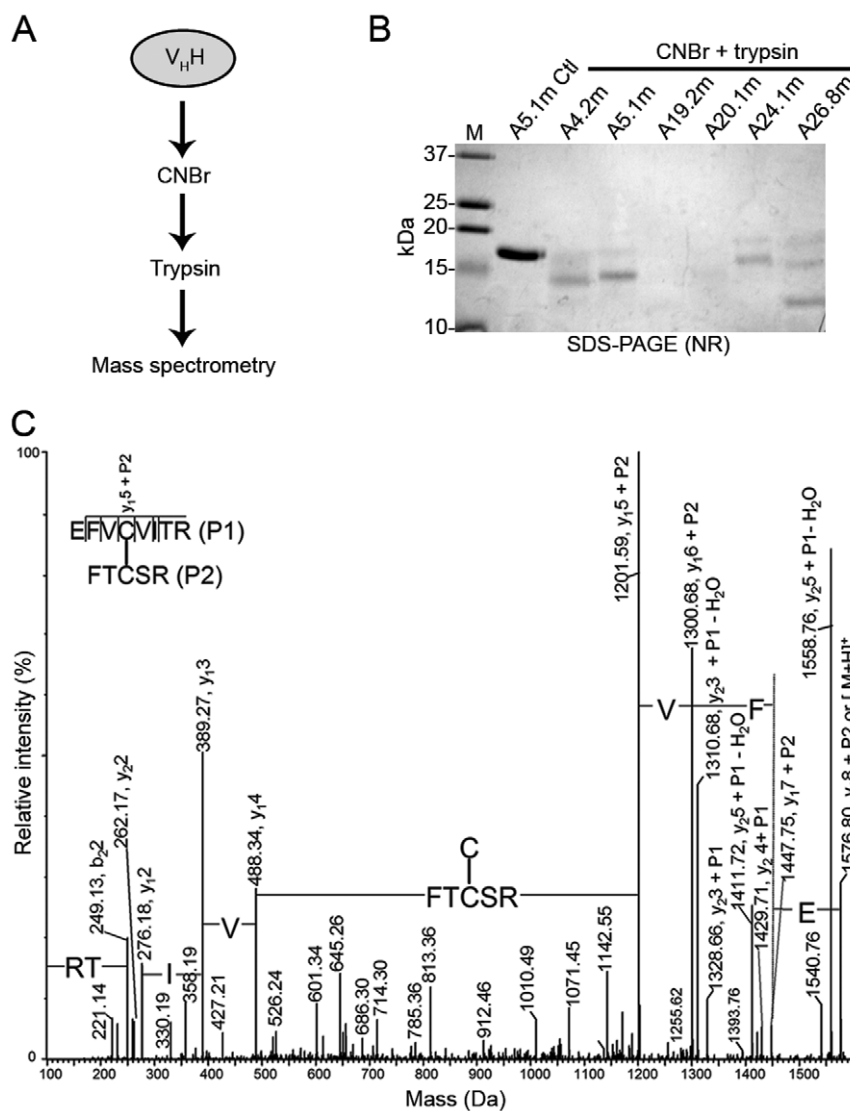

**Figure 2. Disulfide bond formation between residues Cys<sup>54</sup> and Cys<sup>78</sup> is confirmed by MS<sup>2</sup>.** (A) Schematic diagram of mutant V<sub>H</sub>H digestion with cyanogen bromide (CNBr) and trypsin before MS<sup>2</sup> analysis. (B) V<sub>H</sub>Hs (3 μg per lane) were subjected to SDS-PAGE analysis under non-reducing (NR) conditions to illustrate near complete digestion with CNBr and trypsin. Untreated A5.1m was added as a control (Ctl). M: molecular weight marker in kDa. (C) MaxEnt 3 deconvoluted CID-MS<sup>2</sup> spectrum of the m/z 526.25 (3+) ion of the disulfide-linked peptide EFVCVITR (P1) – FTCSR (P2), encompassing the Cys<sup>54</sup>-Cys<sup>78</sup> disulfide bond, from CNBr/trypsin digested A5.1m. doi:10.1371/journal.pone.0028218.g002

**Table 1.** Disulfide linkage determination of mutant V<sub>H</sub>Hs by MS<sup>2</sup> analysis.

| V <sub>H</sub> H | CNBr/trypsin peptides                      | MW <sub>for</sub> | MW <sub>exp</sub> | ΔMW   |
|------------------|--------------------------------------------|-------------------|-------------------|-------|
| A4.2m            | EFV <b>CAVSR</b> FT <b>CSR</b>             | 1519.69           | 1519.70           | -0.01 |
| A5.1m            | EFV <b>CVITR</b> FT <b>CSR</b>             | 1575.75           | 1575.76           | -0.01 |
| A19.2m           | EFV <b>CGISR</b> FT <b>CSR</b>             | 1519.69           | 1519.64           | 0.05  |
| A20.1m           | EFV <b>CAGSSTGR</b> FT <b>CSR</b>          | 1722.74           | 1722.84           | -0.10 |
| A24.1m           | EFV <b>CGISWGGGSTR</b> FT <b>CSR</b>       | 2064.91           | 2064.98           | -0.07 |
| A26.8m           | EFV <b>CVISSTGTSTYYADSVK</b> FT <b>CSR</b> | 2766.25           | 2766.33           | -0.08 |

Mutant V<sub>H</sub>Hs were digested with CNBr and trypsin and the peptides analyzed by MS<sup>2</sup>. The peptides containing the Cys<sup>54</sup>-Cys<sup>78</sup> disulfide linkage are shown with connecting cysteines bolded. A nearly perfect match between MW<sub>for</sub> and MW<sub>exp</sub> equates to the presence of the Cys<sup>54</sup>-Cys<sup>78</sup> disulfide linkage. MW<sub>for</sub>: formula (expected) molecular weight (Da); MW<sub>exp</sub>: experimental molecular weight (Da); ΔMW = MW<sub>for</sub> - MW<sub>exp</sub>.  
doi:10.1371/journal.pone.0028218.t001

slower *k*<sub>on</sub> values. In general, these data suggest the Cys<sup>54</sup>-Cys<sup>78</sup> disulfide bond may slightly distort the V<sub>H</sub>H structure leading to decreases in target binding affinities and decreases in antibody specificity.

### V<sub>H</sub>H Structural and Thermal Stability Characterization

CD experiments were used to examine V<sub>H</sub>H secondary structure, tertiary structure, and thermal stability at both neutral and acidic pH. We first examined V<sub>H</sub>H secondary structure by far-UV CD (Fig. 4A, Fig. S2). Although the overall shape of the far-UV CD spectra from wild-type and mutant V<sub>H</sub>H pairs was similar at a given pH, spectra intensity shifts were observed for all wild-type/mutant pairs. In general, peak minima were seen at 216 nm–218 nm and at 230 nm–235 nm wavelengths but, in almost all cases, the intensity of the peak at 216 nm–218 nm was lower (decreased negative ellipticity) for mutant V<sub>H</sub>Hs. Another prominent feature in the far-UV CD spectra was that mutant V<sub>H</sub>Hs exhibited a near-UV shift in the peak range of 230 nm–235 nm. Wild-type V<sub>H</sub>Hs possessed peak minima around 230 nm–232 nm whereas mutants displayed peak minima in this region around 232 nm–235 nm. Interestingly, A4.2/A4.2m, which of all the wild-type/mutant pairs had the most similar CD spectra at neutral pH, also had the same binding affinity for TcdA.

We next examined V<sub>H</sub>H tertiary structures with near-UV CD spectroscopy (Fig. 4B, Fig. S3). The CD spectra in this region (250 nm–320 nm) come primarily from aromatic residues within the V<sub>H</sub>H, with Phe contributing in the range of 250 nm–270 nm, Tyr contributing in the range of 270 nm–290 nm, and Trp contributing in the range of 280 nm–300 nm. Overall, the near-UV spectra profiles were similar between wild-type and mutant V<sub>H</sub>H pairs. Spectra from wild-type and mutant pairs shared nearly identical peak wavelengths; however, between 250 nm to 295 nm, the ellipticity of mutant V<sub>H</sub>Hs was consistently more negative than wild-type V<sub>H</sub>Hs. There were also subtle differences in peaks occurring around 297 nm, with mutant V<sub>H</sub>Hs exhibiting a minor but consistent shift to the right. Three of the four wild-type/mutant pairs (A4.2/A4.2m, A5.1/A5.1m, and A20.1m/A20.1m) produced predominantly negative ellipticity, whereas the A26.8/A26.8m pair remained positive. The contributions of the second disulfide bond cannot be ruled out as a factor which may augment the contribution of aromatic residues to ellipticity (increasing negatively) of the mutants.

Finally, temperature-induced unfolding experiments were conducted in order to determine V<sub>H</sub>H *T*<sub>m</sub>s and *T*<sub>onset</sub>s by following changes in V<sub>H</sub>H ellipticity at 215 nm (Fig. 5, Fig. S4, Table 3, Table S2). All V<sub>H</sub>Hs exhibited sigmoidal melting curves, indicative of cooperative unfolding of a protein that exists in either a folded or unfolded state. The wild-type V<sub>H</sub>Hs already have high *T*<sub>m</sub>s (as high as 84.7°C) – significantly higher than those reported for other V<sub>H</sub>Hs [60]. At neutral pH, all mutant V<sub>H</sub>Hs had significantly higher thermal unfolding midpoint temperatures (*p* = 0.031, unpaired two-tailed *t*-test) than their wild-type V<sub>H</sub>H counterparts. The *T*<sub>m</sub> values of mutants ranged from 78.8°C to 93.6°C, with one mutant, A5.1m, having a *T*<sub>m</sub> 11.6°C higher than wild-type (A5.1). The increase in mutant V<sub>H</sub>H *T*<sub>m</sub>s relative to wild-type ranged from 3.7°C to 11.6°C. Overall, at neutral pH, the mean *T*<sub>m</sub> ± SEM was 76.2°C ± 1.8°C and 83.6°C ± 2.3°C for wild-type and mutant V<sub>H</sub>Hs, respectively (Fig. 5B). These findings are in agreement with previous reports that showed significant increases in the *T*<sub>m</sub>s of disulfide bond engineered V<sub>H</sub>Hs [37,38,50]. In a second series of experiments, temperature-induced unfolding was conducted at pH 2.0 by once again following V<sub>H</sub>H ellipticity changes at 215 nm (Fig. 5, Fig. S4, Table 3). At acidic pH a considerable reduction in *T*<sub>m</sub> was observed for both wild-type (22.1°C to 32.4°C) and mutant V<sub>H</sub>Hs (23.7°C to 31.2°C) when compared to the *T*<sub>m</sub> values recorded at pH 7.3. However, at acidic pH the *T*<sub>m</sub> of all six mutants was still significantly higher than the corresponding wild-type V<sub>H</sub>Hs (*p* = 0.002, unpaired two-tailed *t*-test). In acid, the increase in mutant V<sub>H</sub>H *T*<sub>m</sub>s relative to wild-type ranged from 2.1°C to 11.6°C, which is a nearly identical spread in temperature increases to that seen at neutral pH. Overall, at pH 2.0, the mean *T*<sub>m</sub> ± SEM was 49.3°C ± 1.2°C and 56.6°C ± 1.2°C for wild-type and mutant V<sub>H</sub>Hs, respectively (Fig. 5B). Interestingly, the highest *T*<sub>m</sub> gains at both pHs were seen for the four strongest neutralizers. The *T*<sub>m</sub> differences between wild-type/mutant pairs are more significant at acidic pH than neutral pH. Taken together, these results (Table 3; Fig. 5) suggest the Cys<sup>54</sup>-Cys<sup>78</sup> disulfide bond may stabilize the V<sub>H</sub>Hs from acid-induced denaturation. Using our thermal unfolding curves, we also identified V<sub>H</sub>H *T*<sub>onset</sub> temperatures, the temperature at which 5% of the V<sub>H</sub>H was unfolded (Fig. 5C; Table S2). The *T*<sub>onset</sub> of mutant V<sub>H</sub>Hs was significantly higher than wild-type V<sub>H</sub>Hs at both neutral and acidic pH (*p* = 0.027 and *p* = 0.006, respectively, unpaired two-tailed *t*-test). The *T*<sub>onset</sub> differences between wild-type/mutant pairs are more significant at acidic pH than neutral pH. At pH 7.3, the mean *T*<sub>onset</sub> ± SEM was 68.9°C ± 1.8°C and 74.9°C ± 1.5°C for wild-type and mutant V<sub>H</sub>Hs, respectively. At pH 2.0, the mean *T*<sub>onset</sub> ± SEM was 41.2°C ± 1.3°C and 47.3°C ± 1.3°C for wild-type and mutant V<sub>H</sub>Hs, respectively. Therefore, the lowest *T*<sub>onset</sub> for the mutants was 45.0°C, whereas two of the wild-type V<sub>H</sub>Hs (A5.1, A20.1) already had *T*<sub>onset</sub>s of ~37°C at pH 2.0 (physiological stomach conditions).

### Protease Digestion Assays

Proteins traveling through the GI tract encounter low pH and digestive enzymes in the stomach. We therefore asked if the Cys<sup>54</sup>-Cys<sup>78</sup> disulfide bond improved V<sub>H</sub>H resistance to proteolytic degradation. We compared the effects of the major GI proteases pepsin, trypsin, and chymotrypsin on wild-type and mutant V<sub>H</sub>Hs through SDS-PAGE and MS analysis. Initially, protease concentrations of 0.1 μg/mL, 1 μg/mL, 10 μg/mL, and 100 μg/mL were explored. When the lowest concentrations of proteases (0.1 μg/mL and 1 μg/mL) were used in digestion reactions, wild-type and mutants appeared similar to undigested controls on SDS-PAGE (data not shown). Similarly, V<sub>H</sub>Hs were only moderately

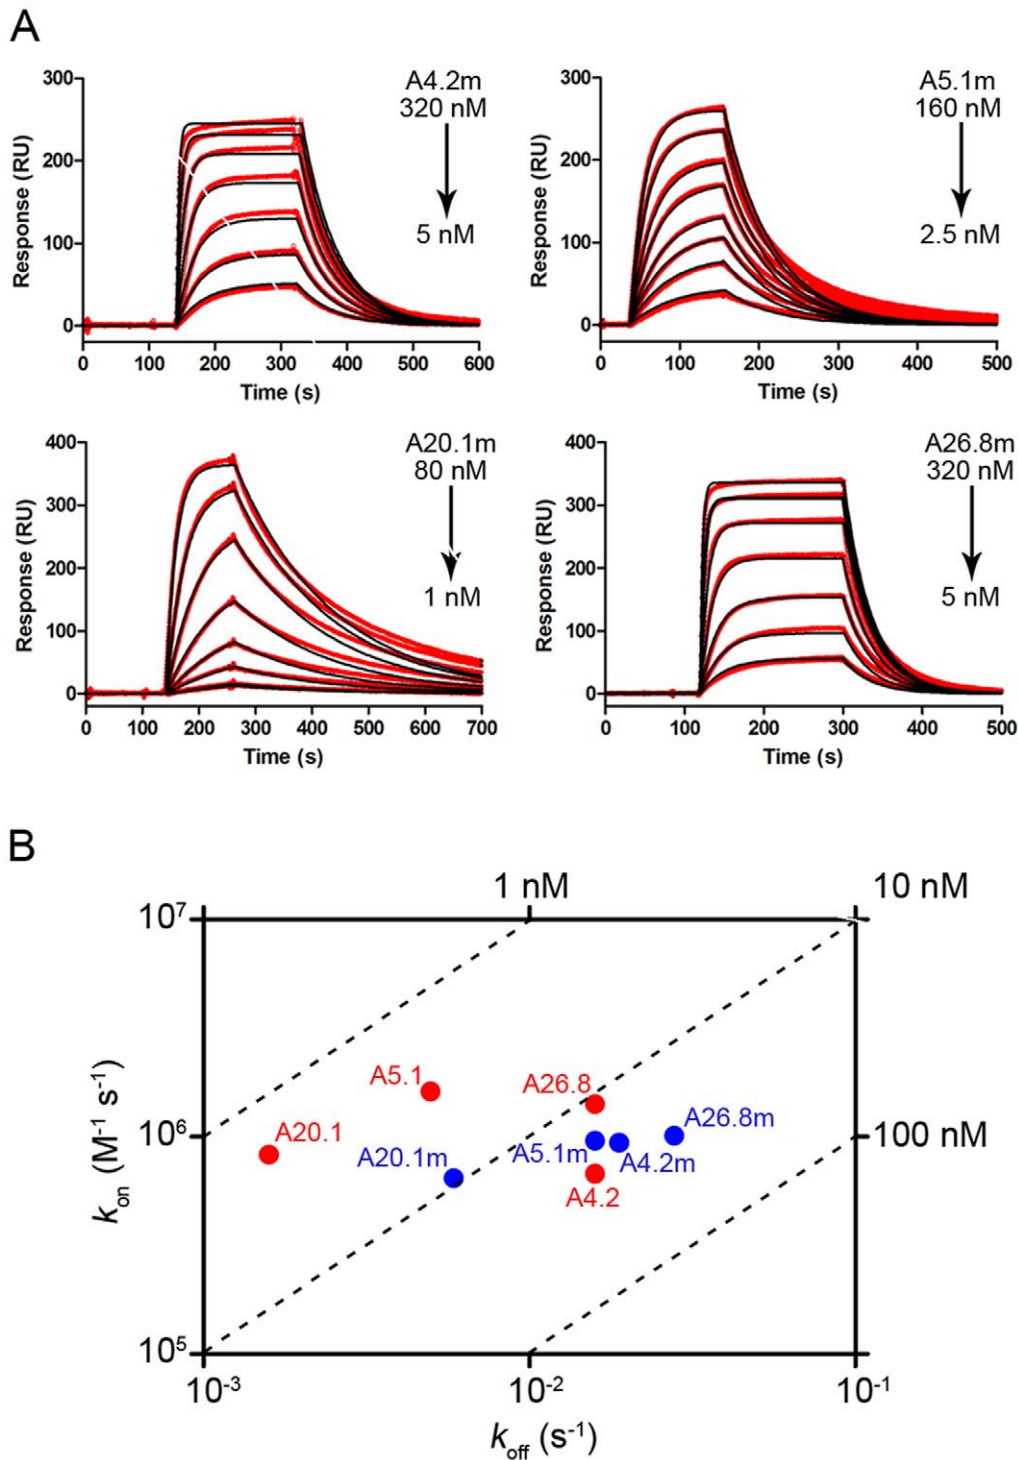

**Figure 3. Mutant V<sub>H</sub>Hs retain high affinity binding to TcdA.** (A) SPR sensorgrams demonstrating mutant V<sub>H</sub>Hs retained high affinity binding to immobilized *C. difficile* TcdA. The range of V<sub>H</sub>H concentrations used in each experiment is shown. Red lines represent measured interaction data, and black lines represent fitted curves. The kinetic and affinity constants are reported in Table 2. Binding of A19.2m and A24.1m to TcdA was non-specific, and the kinetic and affinity constants could not be determined. (B) Rate plane plot with iso-affinity diagonals comparing wild-type (red) and mutant V<sub>H</sub>Hs (blue).  
doi:10.1371/journal.pone.0028218.g003

susceptible to protease degradation at 10 µg/mL (data not shown). In order to see clear differences in the proteolytic susceptibility of wild-type and mutant V<sub>H</sub>Hs, all remaining digestions were performed at protease concentrations of 100 µg/mL. SDS-PAGE

analysis of pepsin-digested wild-type and mutant V<sub>H</sub>Hs showed a reduction in V<sub>H</sub>H size from ~16 kDa (control) to either ~14 kDa, or complete digestion to smaller fragments (Fig. 6A). The band at ~14 kDa routinely appeared in digestions with each of the

**Table 2.** Kinetic and affinity constants of wild-type and mutant V<sub>H</sub>Hs.

| V <sub>H</sub> H | Wild-type <sup>a</sup>                             |                                     |                     | Mutant                                             |                                     |                     | Fold change in K <sub>D</sub> <sup>b</sup> |
|------------------|----------------------------------------------------|-------------------------------------|---------------------|----------------------------------------------------|-------------------------------------|---------------------|--------------------------------------------|
|                  | k <sub>on</sub> (M <sup>-1</sup> s <sup>-1</sup> ) | k <sub>off</sub> (s <sup>-1</sup> ) | K <sub>D</sub> (nM) | k <sub>on</sub> (M <sup>-1</sup> s <sup>-1</sup> ) | k <sub>off</sub> (s <sup>-1</sup> ) | K <sub>D</sub> (nM) |                                            |
| A4.2/A4.2m       | 6.7×10 <sup>5</sup>                                | 1.6×10 <sup>-2</sup>                | 24                  | 9.3×10 <sup>5</sup>                                | 1.9×10 <sup>-2</sup>                | 20                  | -1.2                                       |
| A5.1/A5.1m       | 1.6×10 <sup>6</sup>                                | 5.0×10 <sup>-3</sup>                | 3                   | 9.5×10 <sup>5</sup>                                | 1.6×10 <sup>-2</sup>                | 17                  | +5.7                                       |
| A19.2/A19.2m     | 1.4×10 <sup>4</sup>                                | 3.9×10 <sup>-3</sup>                | 290                 | -                                                  | -                                   | -                   | -                                          |
| A20.1/A20.1m     | 8.2×10 <sup>5</sup>                                | 1.6×10 <sup>-3</sup>                | 2                   | 6.4×10 <sup>5</sup>                                | 5.9×10 <sup>-3</sup>                | 9.2                 | +4.6                                       |
| A24.1/A24.1m     | 6.0×10 <sup>4</sup>                                | 1.6×10 <sup>-2</sup>                | 260                 | -                                                  | -                                   | -                   | -                                          |
| A26.8/A26.8m     | 1.4×10 <sup>6</sup>                                | 1.6×10 <sup>-2</sup>                | 12                  | 1.0×10 <sup>6</sup>                                | 2.8×10 <sup>-2</sup>                | 28                  | +2.3                                       |

<sup>a</sup>Data obtained from [20].<sup>b</sup>Relative to wild-type V<sub>H</sub>H.

doi:10.1371/journal.pone.0028218.t002

proteases. Similar to V<sub>H</sub> protease digestion studies [61], MS mass analysis on the ~14 kDa products revealed cleavage at various positions within the V<sub>H</sub>H C-terminal c-Myc epitope tag. Loss of the epitope tag corresponded to reductions of 1641.7 Da, 1754.8 Da, and 1641.7 Da for pepsin, trypsin, and chymotrypsin digested V<sub>H</sub>Hs, respectively (data not shown).

Overall, significant increases in pepsin resistance were found for all mutant V<sub>H</sub>Hs compared to their wild-type counterparts ( $p = 0.026$ , Mann-Whitney  $U$  test) (Fig. 6B; Fig. 7; Table 4). The increase in mutant V<sub>H</sub>H pepsin resistance relative to corresponding wild-type ranged from almost 4.5% to 63% (Table 4). For example, A5.1 was completely degraded after incubation with pepsin, while nearly 50% of A5.1m remained intact (Fig. 6A, B). The biggest increase in pepsin resistance was found for A4.2m, where an almost 63% increase in intact V<sub>H</sub>H structure was found

relative to A4.2. Interestingly, A4.2m also had the highest  $T_m$  and  $T_{onset}$  at pH 2.0 (Table 3; Table S2), the same pH at which the pepsin digestions were performed. Increases in mutant V<sub>H</sub>H resistance to chymotrypsin were not as universal (Fig. 7; Fig. S5, Table 4) but, nonetheless, 4 of 6 mutant V<sub>H</sub>Hs showed increased resistance to chymotrypsin, with significant increases found in clones A5.1m, A24.1m, and A26.8m ( $p < 0.05$ ) compared to their wild-type counterparts. No statistical differences were found between trypsin digested wild-type and mutant V<sub>H</sub>Hs (Fig. 7; Fig. S5, Table 4), except for A4.2m, where trypsin resistance was actually reduced from almost 36% in the wild-type V<sub>H</sub>H to almost 5% in the mutant. Both the wild-type and mutant versions of A19.2 and A26.8 were very susceptible to trypsin degradation.

A correlation was observed between V<sub>H</sub>H pepsin resistance and  $T_{m,s}$  at pH 2.0 ( $r^2 = 0.735$ , Fig. 8A). The wild-type V<sub>H</sub>Hs with

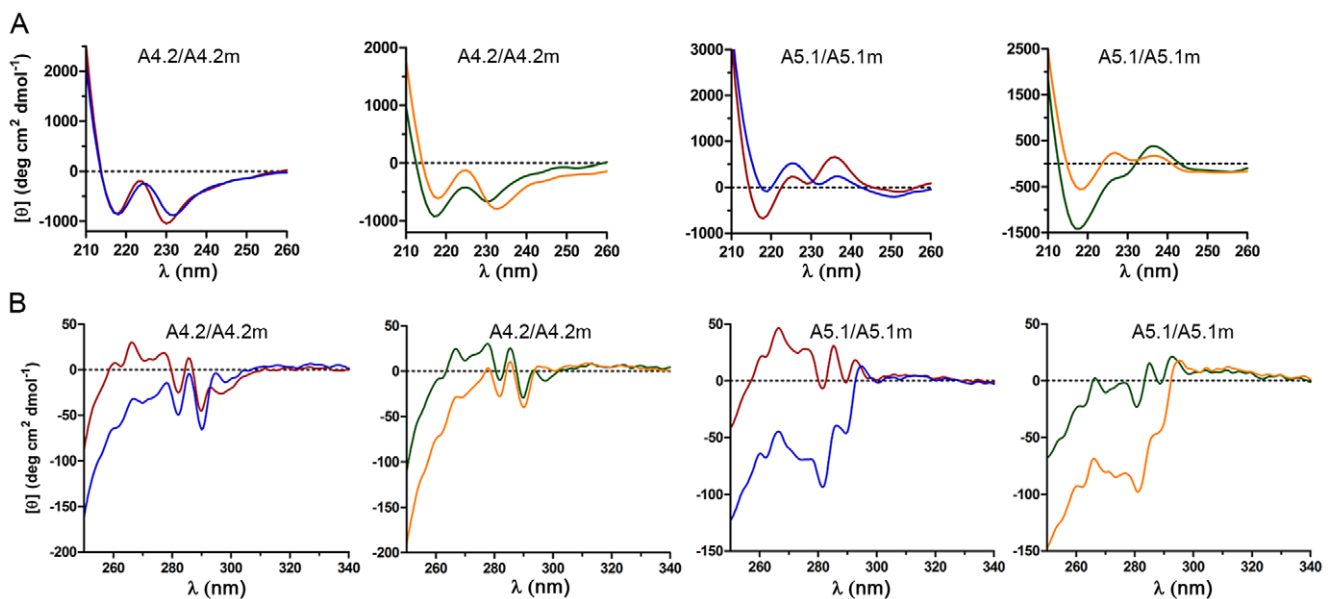

**Figure 4. Representative far-UV and near-UV CD spectra of wild-type and mutant V<sub>H</sub>Hs at neutral and acidic pH.** Far-UV CD spectra (A) and near-UV CD spectra (B) of A4.2/A4.2m and A5.1/A5.1m at neutral and acidic pH. Far-UV scans (210 nm–260 nm) were performed at 25°C on V<sub>H</sub>Hs (50 μg/mL) equilibrated for 2 h in 10 mM sodium phosphate buffer (pH 7.3) or 10 mM sodium phosphate buffer+50 mM HCl (pH 2.0) in a 5 mm cuvette. Near-UV scans (250 nm–340 nm) were performed at 25°C on V<sub>H</sub>Hs (250 μg/mL) under similar conditions in a 10 mm cuvette. All spectra represent the mean residue ellipticity from 8 data accumulations collected from 2 independent experiments. Raw data were smoothed using the Jasco software and converted to mean residue ellipticity as described in *Methods*. Red lines: wild-type V<sub>H</sub>H at pH 7.3; blue lines: mutant V<sub>H</sub>H at pH 7.3; green lines: wild-type V<sub>H</sub>H at pH 2.0; orange lines: mutant V<sub>H</sub>H at pH 2.0.

doi:10.1371/journal.pone.0028218.g004



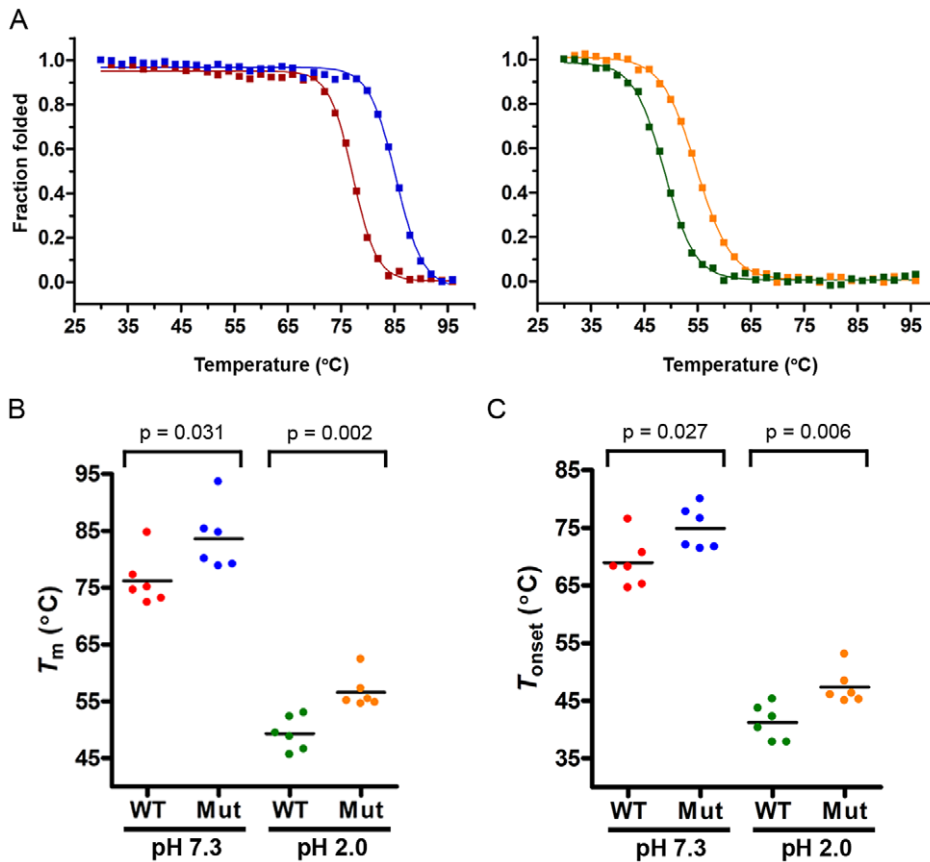

**Figure 5. Mutant V<sub>H</sub>H thermal unfolding midpoint temperatures are significantly greater than those of wild-type V<sub>H</sub>Hs.** (A) Representative example showing the thermal unfolding of A26.8 (WT) and A26.8m (Mut) at neutral pH (left) and acidic pH (right). V<sub>H</sub>H thermal unfolding midpoint temperatures ( $T_m$ s) were determined using CD spectroscopy by following antibody unfolding (50  $\mu$ g/mL) at 215 nm in 10 mM sodium phosphate buffer  $\pm$  50 mM HCl. Raw data were converted to fraction folded, as described in *Methods*, and the  $T_m$  was determined by Boltzmann sigmoidal curve fitting ( $r^2$  ranging from 0.9965–0.9995).  $T_{onset}$  was determined from the same curve and was defined as the temperature at which 5% of the V<sub>H</sub>H was unfolded. Red lines: wild-type V<sub>H</sub>H at pH 7.3; blue lines: mutant V<sub>H</sub>H at pH 7.3; green lines: wild-type V<sub>H</sub>H at pH 2.0; orange lines: mutant V<sub>H</sub>H at pH 2.0. (B) Summary of V<sub>H</sub>H  $T_m$ s. (C) Summary of V<sub>H</sub>H  $T_{onset}$ s. In B and C, dots represent individual V<sub>H</sub>Hs and the black bars represent the mean  $T_m$  or  $T_{onset}$ , respectively. P-values were determined using the unpaired two-tailed *t*-test. doi:10.1371/journal.pone.0028218.g005

lower  $T_m$ s occupied the low protease resistance region of the graph, the mutants with higher  $T_m$ s occupied the high protease resistance region of the graph. There was also a moderate correlation between V<sub>H</sub>H pepsin resistance and  $T_m$ s at pH 7.3 ( $r^2 = 0.500$ , data not shown). No correlation was evident between

V<sub>H</sub>H trypsin resistance and  $T_m$ s at pH 7.3 or pH 2.0 ( $r^2 = 0.138$  and  $r^2 = 0.138$ , respectively) or between V<sub>H</sub>H chymotrypsin resistance and  $T_m$ s at pH 7.3 or pH 2.0 ( $r^2 = 0.012$  and  $r^2 = 0.004$ , respectively). In addition, a strong correlation between wild-type V<sub>H</sub>H pepsin resistance and wild-type V<sub>H</sub>H  $T_{onset}$  at pH 2.0 was noted ( $r^2 = 0.975$ , Fig. 8B, Table S2). No correlation was evident between mutant V<sub>H</sub>H pepsin resistance and mutant V<sub>H</sub>H  $T_{onset}$  at pH 2.0 ( $r^2 = 0.191$ ), presumably because mutant V<sub>H</sub>H  $T_{onset}$  temperatures were much higher than the temperature at which pepsin digestions were performed (37°C). Interestingly, we also noted a correlation between V<sub>H</sub>H trypsin resistance and the theoretical number of trypsin cleavage sites located within the whole V<sub>H</sub>H ( $r^2 = 0.822$ ) or located within the V<sub>H</sub>H CDR ( $r^2 = 0.681$ ) regions (Table S3, Fig. S6). No correlation was found between V<sub>H</sub>H pepsin or chymotrypsin resistance and the theoretical number of pepsin or chymotrypsin cleavage sites, respectively (Fig. S6).

The ability of pepsin-treated mutants (A4.2m, A5.1m, A20.1m, and A26.8m) to bind TcdA was evaluated by SPR. SPR analyses confirmed the mutants (“V<sub>H</sub>H-tag”; see Fig. 6A) retained TcdA binding as their  $k_{off}$  values were essentially the same as those of untreated controls (Table 2; Fig. 6C). SPR analysis on pepsin-digested wild-type V<sub>H</sub>Hs could not be performed since these

**Table 3. Thermal unfolding midpoint temperatures ( $T_m$ ) of wild-type and mutant V<sub>H</sub>Hs.**

| V <sub>H</sub> H | $T_m$ (°C) at pH 7.3 |        |              | $T_m$ (°C) at pH 2.0 |        |              |
|------------------|----------------------|--------|--------------|----------------------|--------|--------------|
|                  | Wild-type            | Mutant | $\Delta T_m$ | Wild-type            | Mutant | $\Delta T_m$ |
| A4.2/A4.2m       | 84.7*                | 93.6*  | 8.9          | 52.3                 | 62.4   | 10.1         |
| A5.1/A5.1m       | 73.1                 | 84.7*  | 11.6         | 45.6                 | 57.2   | 11.6         |
| A19.2/A19.2m     | 75.1                 | 78.8   | 3.7          | 53.0                 | 55.1   | 2.1          |
| A20.1/A20.1m     | 72.4                 | 79.1   | 6.7          | 46.6                 | 55.4   | 8.8          |
| A24.1/A24.1m     | 74.6                 | 80.1   | 5.5          | 49.4                 | 54.6   | 5.2          |
| A26.8/A26.8m     | 77.2                 | 85.3*  | 8.1          | 48.8                 | 54.8   | 6.0          |

\*Minimum estimated  $T_m$ .

doi:10.1371/journal.pone.0028218.t003

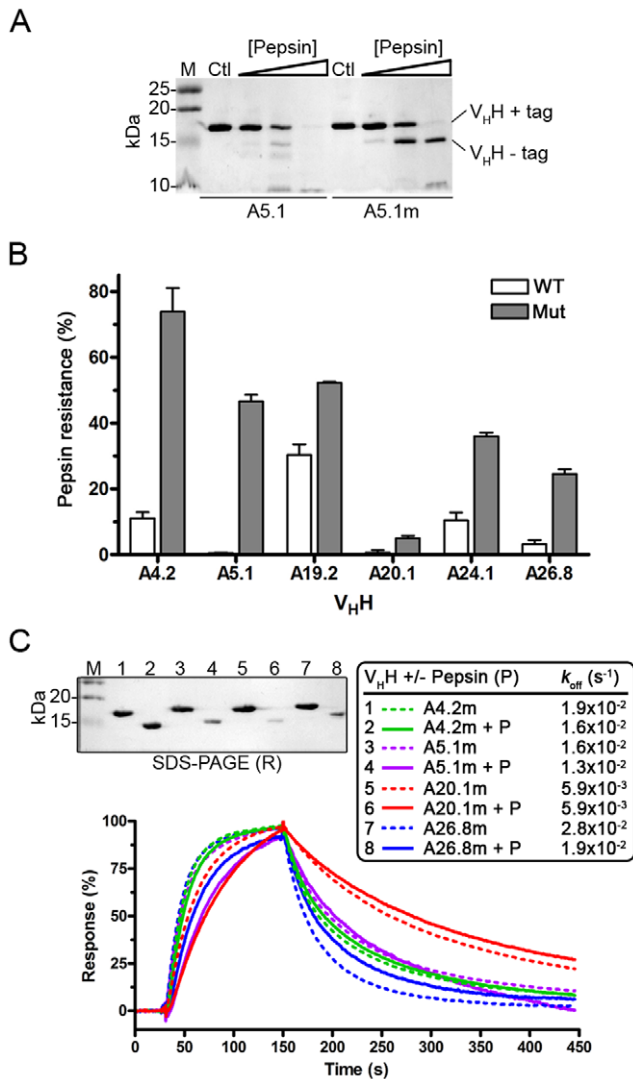

**Figure 6. Mutant V<sub>H</sub>Hs are resistant to pepsin degradation.** (A) Representative SDS-PAGE analysis showing the separation of A5.1 and A5.1m V<sub>H</sub>Hs after digestion with various concentrations of pepsin (increasing from left to right: 1 μg/mL, 10 μg/mL and 100 μg/mL) at pH 2.0 and 37°C for 1 h. Control V<sub>H</sub>Hs (Ctl) were incubated under the same conditions without pepsin. Three micrograms of protein was loaded per lane. Bands appearing ~2 kDa below the full-length V<sub>H</sub>H (“V<sub>H</sub>H+tag”) were identified by MS (data not shown) as V<sub>H</sub>Hs cleaved within the C-terminal c-Myc tag (“V<sub>H</sub>H–tag”), as shown before with protease-digested human V<sub>H</sub>Hs [61]. (B) Summary of V<sub>H</sub>H resistance profiles to 100 μg/mL pepsin treatment. Resistance values were obtained by densitometric measurements of pepsin-treated V<sub>H</sub>Hs relative to controls (as in Fig. 6A). Error bars represent the SEM obtained from 3 independent digestions for each V<sub>H</sub>H. (C) SPR analysis (bottom) on mutant V<sub>H</sub>Hs digested with pepsin (100 μg/mL, 1 h, 37°C). The pepsin-treated V<sub>H</sub>Hs retained their ability to bind surface-immobilized TcdA. SDS-PAGE (top) showing untreated (lanes 1, 3, 5, 7) and pepsin-digested (lanes 2, 4, 6, 8) V<sub>H</sub>Hs used for SPR. The contents of lanes 1 thru 8 are described in the box in C. Normalized k<sub>off</sub>s for pepsin treated V<sub>H</sub>Hs were similar to the k<sub>off</sub> of untreated controls (box and Table 2). M: molecular weight markers in kDa; WT: wild-type V<sub>H</sub>H; Mut: mutant V<sub>H</sub>H; P: pepsin; R: reducing SDS-PAGE conditions. doi:10.1371/journal.pone.0028218.g006

V<sub>H</sub>Hs were significantly degraded by pepsin. These experiments highlight the profound impact a second disulfide bond in the hydrophobic core has on V<sub>H</sub>H conformational stability at low pH and resistance to proteolytic degradation by pepsin.

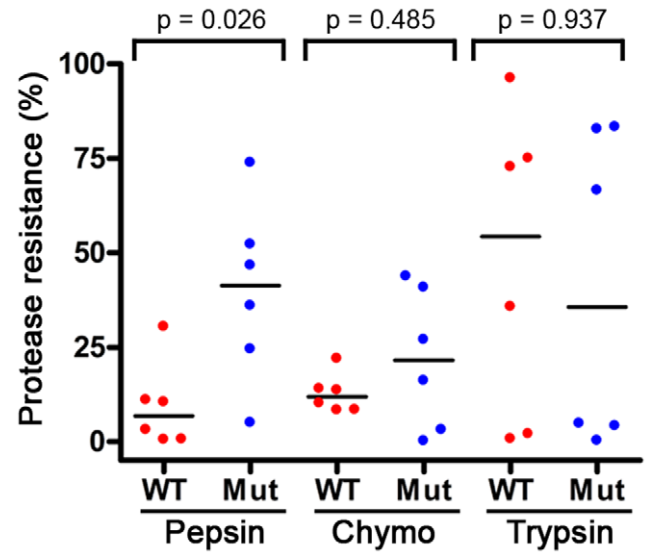

**Figure 7. Summary of V<sub>H</sub>H resistance profiles to pepsin, trypsin, and chymotrypsin.** V<sub>H</sub>H resistance to the major GI proteases was determined by proteolytic digestion (100 μg/mL protease, 37°C, 1 h) and SDS-PAGE densitometry analysis. Dots represent the mean (n=3) protease resistance profile of each V<sub>H</sub>H relative to undigested controls and the black bars represent the median resistance of each group. P-values were determined using the unpaired two-tailed Mann-Whitney U test. WT: wild-type V<sub>H</sub>H; Mut: mutant V<sub>H</sub>H; Chymo: chymotrypsin. doi:10.1371/journal.pone.0028218.g007

#### Toxin Neutralization Assay

Mutant V<sub>H</sub>Hs retained their ability to neutralize the cytotoxic effects of TcdA on monolayers of fibroblast cells. Comparison of the neutralization capacity of pooled mixtures (1000 nM total) of wild-type and mutant V<sub>H</sub>Hs revealed mutants performed nearly as well as wild-types at reducing TcdA-mediated cell rounding (Fig. 9). Given that 3 of 4 mutants showed weaker affinity for TcdA the reduction in neutralizing capacity relative to wild-type V<sub>H</sub>Hs was not unexpected.

#### Discussion

The rapid development of bacterial resistance to most major classes of antibiotics has created a demand for novel therapeutics in the fight against infectious diseases. One of the most pursued non-antibiotic strategies involves targeting bacterial virulence factors with small molecules and antibodies. For some pathogens, inhibition of toxins and colonization factors within the GI tract may be an effective means of disease control. Oral immunotherapy for treating infectious diseases has had limited success due to the instability of immunoglobulins in the extreme pH and protease-rich environment of the GI tract. Here, through protein engineering, we increased the protease, acid and thermal stability of llama-derived sdAbs (V<sub>H</sub>Hs) which target and neutralize *C. difficile* toxin A without dramatically affecting biological function.

Our stabilization strategy involved the substitutions of two amino acid residues at positions 54 and 78 for cysteine, allowing for the formation of a second, non-native disulfide bond between FR2 and FR3 in the V<sub>H</sub>H hydrophobic core. Incorporation of a disulfide bond at these positions has been previously reported in camelid V<sub>H</sub>Hs [37,38,50] and was found to increase V<sub>H</sub>H chemical and thermal stability. We hypothesized that the additional disulfide bond may also enhance V<sub>H</sub>H resistance to proteases, especially in denaturing acidic conditions.

**Table 4.** Protease resistance profiles of wild-type and mutant V<sub>H</sub>Hs to the major GI proteases.

| V <sub>H</sub> H | Pepsin resistance (%) |            | Chymotrypsin resistance (%) |            | Trypsin resistance (%) |            |
|------------------|-----------------------|------------|-----------------------------|------------|------------------------|------------|
|                  | Wild-type             | Mutant     | Wild-type                   | Mutant     | Wild-type              | Mutant     |
| A4.2/A4.2m       | 11.08±1.88            | 73.87±7.23 | 13.60±6.50                  | 3.18±1.10  | 35.72±7.08             | 4.80±0.61  |
| A5.1/A5.1m       | 0.53±0.15             | 46.63±1.99 | 14.03±3.15                  | 27.00±4.05 | 96.23±7.09             | 83.30±4.96 |
| A19.2/A19.2m     | 30.37±3.16            | 52.27±0.32 | 8.30±1.14                   | 0.18±0.10  | 0.73±0.73              | 0.27±0.27  |
| A20.1/A20.1m     | 0.68±0.68             | 5.04±0.76  | 10.17±1.85                  | 16.17±5.26 | 72.77±4.85             | 82.80±1.97 |
| A24.1/A24.1m     | 10.45±2.39            | 36.02±1.11 | 22.03±5.01                  | 43.80±2.08 | 75.03±9.63             | 66.50±3.58 |
| A26.8/A26.8m     | 3.17±1.24             | 24.56±1.45 | 8.40±1.23                   | 40.83±8.81 | 2.03±2.03              | 4.10±1.27  |

All V<sub>H</sub>H digestions were performed at 37°C for 1 h in the presence of 100 µg/mL protease. Resistance values were obtained by comparing the intensity of protease-digested V<sub>H</sub>Hs relative to untreated controls using SDS-PAGE and imaging software. See Fig. 6A as an example. Values represent the mean ± SEM (n = 3). Data were incorporated into Fig. 6B and Fig. S5.

doi:10.1371/journal.pone.0028218.t004

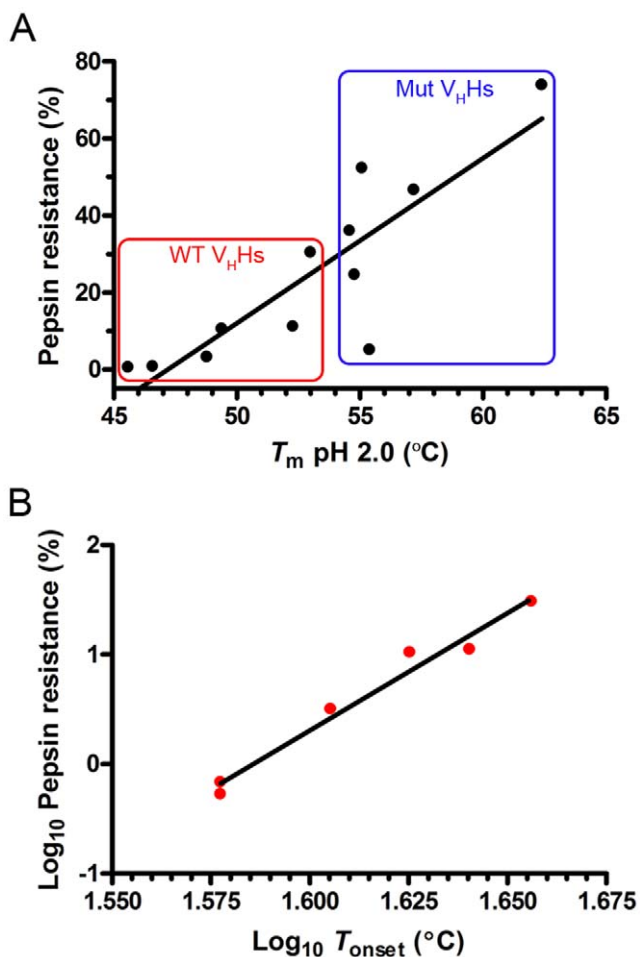

**Figure 8. Correlation between V<sub>H</sub>H pepsin resistance and thermal stability at acidic pH.** (A) Linear regression between V<sub>H</sub>H pepsin resistance and V<sub>H</sub>H  $T_m$  at pH 2.0. Red and blue boxes show the wild-type (WT) and mutant (Mut) V<sub>H</sub>Hs, respectively. Linear regression analysis gave a correlation coefficient of  $r^2=0.735$  and a significantly non-zero slope of the line ( $p=0.0004$ ). (B) Linear regression between wild-type V<sub>H</sub>H pepsin resistance and wild-type V<sub>H</sub>H  $T_{onset}$  at pH 2.0. The  $T_{onset}$  is defined as the temperature at which 5% of the V<sub>H</sub>H is unfolded. Linear regression analysis gave a correlation coefficient of  $r^2=0.975$  and a significantly non-zero slope of the line ( $p=0.0002$ ).  
doi:10.1371/journal.pone.0028218.g008

To test this hypothesis, we generated the disulfide bond mutants and compared them to their wild-type counterparts containing only the native disulfide bond between residues 23 and 104. Mutant V<sub>H</sub>Hs were well expressed in *E. coli* when targeted to the periplasmic space, although with lower yields compared to wild-type V<sub>H</sub>H counterparts, and all were non-aggregating monomers as determined by size exclusion chromatography. To confirm disulfide bond formation, we used a combination of proteolytic and chemical digestion coupled with MS<sup>2</sup> to precisely identify V<sub>H</sub>H peptide fragments harboring the introduced disulfide bond. This approach is preferred over the Ellman's assay approach for the determination of disulfide linkage formation, as it requires less quantities of protein and reveals the positional identity of Cys pairs in a given disulfide bond. The latter information is important, as there is also the possibility that the two engineered Cys residues, besides forming the desired disulfide bond may form undesired disulfide bonds with the two conserved Cys residues at positions 23 and 104. After confirming disulfide bond formation in our mutants, SPR binding experiments revealed most mutant V<sub>H</sub>Hs possessed 1- to 5-fold weaker affinity constants relative to wild-type, which is consistent with observations by others of up to 3-fold

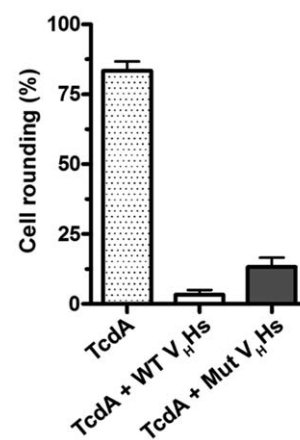

**Figure 9. Mutant V<sub>H</sub>Hs retain TcdA-neutralizing capacity.** Confluent monolayers of IMR-90 human lung fibroblasts were incubated with TcdA (100 ng/mL) or TcdA+V<sub>H</sub>Hs (1000 nM) for 24 h, and the percentage of cells rounded was scored using a light microscope from 0% to 100%. V<sub>H</sub>Hs (wild-type (WT) or mutant (Mut)) were added as pooled mixtures of A4.2, A5.1, A20.1, and A26.8 (250 nM each) or A4.2m, A5.1m, A20.1m, and A26.8m (250 nM each).  
doi:10.1371/journal.pone.0028218.g009

reductions in the affinities of V<sub>H</sub>Hs containing the same introduced disulfide bond [38,50]. However, for the two weak neutralizing V<sub>H</sub>Hs, A19.2m and A24.1m, the non-canonical disulfide linkage compromised specificity.

We used CD spectroscopy to compare wild-type and mutant V<sub>H</sub>H secondary structure, tertiary structure and thermal stability ( $T_m$  and  $T_{onset}$ ). Comparisons of V<sub>H</sub>H secondary and tertiary structure with far-UV and near-UV CD spectroscopy strongly suggested structural differences between wild-type and mutants, at both neutral and acidic pH. For all mutants, peak intensity and selective peak minima shifts were observed, although the overall spectral profiles remained very similar in all wild-type/mutant pairs. More specifically, mutants consistently showed rightward peak shifts in the peak range of 230 nm–235 nm (far-UV CD spectra) and around 297 nm (near-UV CD spectra) compared to wild-type V<sub>H</sub>Hs. Such patterns may be used as signatures that could be used to quickly identify V<sub>H</sub>Hs containing a properly formed non-canonical disulfide bond, as could SDS-PAGE motility values since, compared to wild-type V<sub>H</sub>Hs, mutants consistently moved slower in SDS-PAGE gels. Thus, the far- and near-UV CD spectral data suggests the introduced disulfide bond changes the structure of V<sub>H</sub>Hs. This is consistent with the observed perturbations in affinities and specificities and increased GI protease resistance of the mutant V<sub>H</sub>Hs compared to the wild-types (*see below*). We used CD spectroscopy thermal denaturation experiments to show a profound and significant increase in the  $T_m$ s and  $T_{onset}$ s of mutant V<sub>H</sub>Hs at both neutral and acidic pH. These mutants are more thermostable than previously reported V<sub>H</sub>s, which were affinity selected from a V<sub>H</sub> phage display library under stability pressure [45]. The beneficial effect of the non-canonical disulfide linkage on  $T_m$ s varies widely, with  $T_m$  increases ranging from  $\approx 4^\circ\text{C}$  to  $\approx 12^\circ\text{C}$ . This suggests that for the mutant V<sub>H</sub>Hs with a higher thermostability gain, the non-canonical disulfide linkage may have been a better fit to the overall fold. A19.2m and A24.1m showed the lowest thermostability gains and, if it is true that this is because of an unfit disulfide linkage, it would explain why they were transformed into non-specific binders upon mutation. For A4.2m on the other hand, the non-canonical disulfide linkage seems to be a natural fit, as it increased its  $T_m$  the most (by almost  $12^\circ\text{C}$ ) and significantly improved GI protease resistance (with the highest increase in pepsin resistance; *see below*), all without adversely affecting the  $K_D$ . We also observed a correlation between pepsin resistance and  $T_m$ , and this has implications in terms of using heat as the selective pressure for selecting pepsin resistant antibody fragments by *in vitro* evolutionary approaches.

Most likely, mutants (exhibiting higher  $T_m$ s) also have higher thermodynamic stability since thermodynamic stability generally increases with  $T_m$  [62]. This has been shown to be the case for both V<sub>H</sub> and V<sub>H</sub>H domains as well [38,45]. In the instance of V<sub>H</sub>Hs, it has been shown that the introduction of the Cys54/Cys78 disulfide linkage used in our study into V<sub>H</sub>Hs led to increases in both  $T_m$  and thermodynamic stability. Proteins with higher  $T_m$  are also less likely to unfold [62]. These may be the reasons why our mutants were more resistant to acid-induced unfolding at  $37^\circ\text{C}$ , supported by the higher  $T_{onset}$ s and pepsin resistance of our mutant V<sub>H</sub>Hs (*see below*). Consistent with this, in a previous study, human V<sub>H</sub>s which were more resistant to acid-induced aggregation, a phenomenon encouraged/initiated by protein unfolding, had higher  $T_m$ s and thermodynamic stabilities [45]. The improved reversibility of thermal unfolding of mutant V<sub>H</sub>Hs compared to their wild-type counterparts under acidic conditions in our work (data not shown) indicates that the introduced disulfide linkage may also render V<sub>H</sub>Hs with

aggregation resistant unfolded states [48], in addition to higher thermodynamic stability. Hagihara et al [37] showed that the introduction of the same Cys54/Cys78 disulfide linkage into a V<sub>H</sub>H, in addition to increasing its  $T_m$ , led to decreases in its enthalpy and entropy changes of unfolding. The enthalpy and entropy measurements indicated that the stabilization effect of the extra disulfide linkage in V<sub>H</sub>Hs may be related to factors such as loop entropy, internal interactions such as hydrogen bonding and van der Waals interactions and hydration of the native and unfolded states.

We also examined the resistance profiles of the disulfide bond mutants to the major GI proteases. Mutant V<sub>H</sub>Hs were universally more resistant to pepsin and many were more resistance to chymotrypsin when compared to their wild-type counterparts. Protease sensitivity is a function of many variables including the location of proteolytic sites (e.g., loops *vs* protein core in antibodies), the theoretical number of proteolytic sites, and protein compactness and thermodynamic stability [63,64]. Since each wild-type and mutant V<sub>H</sub>H pair possessed the identical number of theoretical protease cleavage sites, we speculate that the second disulfide bond presents a more compact and thermodynamically stable V<sub>H</sub>H structure, preventing pepsin and chymotrypsin from accessing proteolytic cleavage sites. This view is consistent with the increased  $T_m$ s in mutants (an indicator of mutants' increased thermostability), the positive correlation between pepsin resistance and  $T_m$  (Fig. 8), and the lack of correlation between pepsin/chymotrypsin resistance and the number of theoretical protease cleavage sites (Fig. S6). The pepsin resistance *vs*  $T_m/T_{onset}$  correlation curves also point to the fact that structural compactness and thermodynamic stability plays a more prominent role in pepsin resistance, which is understandable given that pepsin requires protein unfolding for efficient digestion. This benefit is not realized for mutants against trypsin, possibly because their cleavage sites are at hydrophilic residues (Lys or Arg) which must be in more exposed regions of the V<sub>H</sub>H, possibly located in the CDR regions. Further, these regions would not be protected by stabilizing the core of the structure. The positive correlation between V<sub>H</sub>H trypsin resistance and the number of theoretical trypsin cleavage sites is a testament to this (Fig. S6). Harmsen et al [49] have suggested the CDR regions of V<sub>H</sub>Hs to be the most sensitive sites to proteolysis due to their flexibility and exposed position relative to the V<sub>H</sub>H core. Indeed, there are more predicted trypsin-cleavage sites in the CDR regions (Table S3; Fig. S6) of trypsin-sensitive V<sub>H</sub>Hs (A4.2, A19.2 and A26.8) compared to trypsin-resistant V<sub>H</sub>Hs (A5.1, A20.1 and A24.1). This is not the case for pepsin and chymotrypsin sensitivities (Table S3; Fig. S6).

Importantly, we also observed an increase in  $T_{onset}$  temperatures for mutants at the physiological conditions representative of the stomach (pH  $\approx 2.0$  and  $37^\circ\text{C}$ ) to values significantly above  $37^\circ\text{C}$  ( $T_{onset}$ s from  $45^\circ\text{C}$ – $53^\circ\text{C}$ ). This suggests that the mutants should remain fully folded at  $37^\circ\text{C}$  in the stomach, hence resisting pepsin degradation (and denaturation) to a higher extent than wild-type V<sub>H</sub>Hs, a statement supported by our *in vitro* pepsin digestion experiments. In contrast to the mutants, 3 wild-type V<sub>H</sub>Hs, for example, have low  $T_{onset}$  values of  $37.8^\circ\text{C}$  (A5.1 and A20.1) and  $40.3^\circ\text{C}$  (A26.8) which suggests they would partially unfold in the stomach (pH  $\approx 2.0$ ,  $37^\circ\text{C}$ ), increasing their proteolytic susceptibility. This indeed is the case in an *in vitro* setting as A5.1 and A20.1, V<sub>H</sub>Hs with  $T_{onset}$  temperatures overlapping the physiological temperature, are completely pepsin sensitive, and A26.8 with a  $T_{onset}$  slightly above the physiological temperature, although somewhat better than the former two, is barely resistant to pepsin (pepsin resistance:  $\approx 3\%$ ). In the corresponding pepsin resistant mutants, acquiring resistance

parallels an increase in  $T_{\text{onset}}$ . In line with these findings, we observe a strong positive correlation between pepsin resistance and  $T_{\text{onset}}$  (Fig. 8), and depending on the melting curve profile,  $T_{\text{onset}}$  may be better predictors of protein pepsin resistance than  $T_{\text{m}}$ s.

Compared to other studies involving *in vitro* V<sub>H</sub>H proteolysis, our mutant V<sub>H</sub>Hs performed remarkably well, withstanding near physiological concentrations of pepsin and chymotrypsin and retaining functionality thereafter. Additionally, half of the mutants were trypsin resistant and for those which were not, identification and removal of their cleavage site(s) should be straightforward, e.g., by MS analysis and site-directed mutagenesis. Balan et al [65] note the human stomach contains pepsin concentrations ranging from 500 µg/mL to 1 mg/mL, while Schmidt et al [66] found the average pepsin concentration in the stomach of piglets to be 155 U/mL. Our pepsin digestion assays were performed at 100 µg/mL concentrations, which correspond to 46 U/mL. The most stable V<sub>H</sub>H mutant produced by Harmsen et al [49] using a DNA shuffling approach showed only 21% residual V<sub>H</sub>H remaining after digestion with 100 µg/mL of pepsin. In contrast, our most stable V<sub>H</sub>H (A4.2m) showed 74% residual V<sub>H</sub>H remaining after digestion, while 4 others had residual pepsin resistance values of 24% or higher. In addition, all 4 disulfide bond mutant V<sub>H</sub>Hs retained binding to TcdA after pepsin treatment, confirming their resistance to the protease and retention of functionality.

We also examined the toxin A neutralizing efficacy of our disulfide bond mutant V<sub>H</sub>Hs. Compared to the wild-type V<sub>H</sub>Hs, the mutants were 3–4 fold weaker with respect to toxin A neutralization in cell-based assays, presumably a reflection in the reduced affinities of 3 of 4 V<sub>H</sub>Hs for the toxin. If a more thorough analysis was performed on individual V<sub>H</sub>Hs, it is possible that clone A4.2m, which showed the same affinity as A4.2 for toxin A, might be a more potent neutralizer due to its higher stability. Under stringent conditions *in vivo*, the lower affinity mutants may actually be more efficacious than the higher affinity wild-type V<sub>H</sub>Hs due to their greater stability, as shown elsewhere [50]. Also, a number of methods are available to increase the affinity of the disulfide-stabilized domains, allowing for the creation of superpotent toxin A neutralizing antibodies capable of withstanding a wide range of harsh conditions.

In conclusion, we have shown that the introduction of a second disulfide bond into the hydrophobic core of a panel of llama V<sub>H</sub>Hs increased thermal stability and GI protease resistance; the approach is both effective and general. The approach does not come without some drawbacks, including, reduced affinity, specificity, and expression yield. However, the mutants outperformed the wild-type V<sub>H</sub>Hs under more stringent physiological conditions, which outweighs the reductions in affinity, as noted above. Whether the mutant V<sub>H</sub>Hs are more efficacious than the wild-type V<sub>H</sub>Hs *in vivo* remains to be determined. Based on our results and those of others, we suggest incorporating the non-canonical disulfide bond between position 54 and 78 at the library construction phase and not after the selection/screening phase to avoid adverse side effects on affinity and specificity seen here and in other studies. Other approaches, such as affinity maturation, could be used to overcome losses in target affinity as a result of disulfide bond incorporation. Our mutant V<sub>H</sub>Hs are ideal building blocks for oral therapeutic agents that must survive the harsh GI tract, and provide promising alternatives to antibiotics. The oral administration of therapeutic proteins is of interest to the pharmaceutical and biotechnological industries [29,63,67,68]. Protein-based oral therapeutics have several conceived advantages over systemic administration: convenience, patient compliance, lower cost, pain-free administration, drug purity, flexibility in

production source (i.e., bacterial, plant, etc.), and fewer concerns over immunogenicity. Despite the many advantages of orally administering protein therapeutics, few successes have been realized due to the destabilizing environment of the GI tract. Of the major GI proteases, pepsin is considered the primary cause of antibody degradation [29,35,49] and hence a major obstacle facing orally delivered antibody therapeutics. Regarding the mutant V<sub>H</sub>Hs generated in this study, the therapeutic efficacy can be further enhanced by improving their affinity (through selection of affinity maturation display libraries) and by formulation. The affinity maturation libraries could yield V<sub>H</sub>Hs which are hyper-stabilized (e.g., high GI protease resistance) in addition to being of ultra-high affinity, if selection pressures (acid, proteases, heat) are applied during the panning stage [43,45]. Indeed, the correlation between V<sub>H</sub>H pepsin resistance and  $T_{\text{m}}$  suggests that selection under heat should produce pepsin-resistant V<sub>H</sub>Hs. Given their stability profile, the mutants may be resistant to serum degradation, making them efficacious systemic therapeutics if they are coupled to a half-life extending molecule. Other applications for our stabilized domains include: (i) use as delivery agents for mucosal vaccines [69] or (ii) use as robust affinity purification reagents resistant to acidic and heat elution steps. Furthermore, the recent incorporation of these engineered disulfide bonds into human V<sub>H</sub> sdAbs not only resulted in increased thermal stability, but also markedly reduced V<sub>H</sub> aggregation [70], suggesting that the introduced disulfide bond imparts a universal stabilizing effect in all immunoglobulin variable domains.

## Supporting Information

**Figure S1 Alignment and comparison of wild-type and mutant V<sub>H</sub>H amino acid sequences.** Wild-type V<sub>H</sub>H sequences are shown with a single disulfide bond between Cys<sup>23</sup> and Cys<sup>104</sup>. A second disulfide bond was introduced through mutation of Ala<sup>54</sup>/Gly<sup>54</sup> and Ile<sup>78</sup> to Cys<sup>54</sup> (\*) and Cys<sup>78</sup> in framework region 2 (FR2) and FR3, respectively. Disulfide bonds are shown as black lines. Residues colored in blue illustrate the disulfide bond-linked peptides identified by nanoRPLC-ESI-MS analysis on CNBr and trypsin digested mutant V<sub>H</sub>Hs (Fig. 2). Amino acid numbering and CDR designation is based on the IMGT system (<http://imgt.cines.fr/>). (TIF)

**Figure S2 Far-UV CD analysis of V<sub>H</sub>Hs at neutral and acidic pH.** CD scans (210 nm–260 nm) were performed at 25°C on V<sub>H</sub>Hs (50 µg/mL) equilibrated for 2 h in 10 mM sodium phosphate buffer (pH 7.3) or 10 mM sodium phosphate buffer+50 mM HCl (pH 2.0). The spectra represent the mean residue ellipticity of 8 data accumulations collected from 2 independent experiments. Raw data were smoothed using the Jasco software and converted to mean residue ellipticity as described in *Methods*. Red lines: wild-type V<sub>H</sub>H at pH 7.3; blue lines: mutant V<sub>H</sub>H at pH 7.3; green lines: wild-type V<sub>H</sub>H at pH 2.0; orange lines: mutant V<sub>H</sub>H at pH 2.0. (TIF)

**Figure S3 Near-UV CD analysis of V<sub>H</sub>Hs at neutral and acidic pH.** CD scans (250 nm–340 nm) were performed at 25°C on V<sub>H</sub>Hs (250 µg/mL) equilibrated for 2 h in 10 mM sodium phosphate buffer (pH 7.3) or 10 mM sodium phosphate buffer+50 mM HCl (pH 2.0). The spectra represent the mean residue ellipticity from 8 data accumulations collected from 2 independent experiments. Raw data were smoothed using the Jasco software and converted to mean residue ellipticity as described in *Methods*. Red lines: wild-type V<sub>H</sub>H at pH 7.3; blue lines: mutant V<sub>H</sub>H at

pH 7.3; green lines: wild-type V<sub>H</sub>H at pH 2.0; orange lines: mutant V<sub>H</sub>H at pH 2.0. (TIF)

**Figure S4 V<sub>H</sub>H thermal unfolding curves.** (A) Thermal unfolding of wild-type and mutant V<sub>H</sub>Hs (50 µg/mL) at pH 7.3 (10 mM sodium phosphate buffer) and pH 2.0 (10 mM sodium phosphate buffer+50 mM HCl) were followed at 215 nm to identify the thermal unfolding midpoint temperature ( $T_m$ ). The  $T_m$  was determined for each curve by Boltzmann non-linear curve fitting analysis in GraphPad Prism. The goodness of curve fit ( $r^2$ ) ranged from 0.9901–0.9995. In the case of V<sub>H</sub>Hs with few lower baseline data points the  $T_m$  is a minimal estimate (see Table 3). Red lines: wild-type V<sub>H</sub>H at pH 7.3; blue lines: mutant V<sub>H</sub>H at pH 7.3; green lines: wild-type V<sub>H</sub>H at pH 2.0; orange lines: mutant V<sub>H</sub>H at pH 2.0. (B) Raw thermal unfolding data used to generate the normalized curves in (A). (TIF)

**Figure S5 V<sub>H</sub>H resistance profiles against trypsin and chymotrypsin.** Wild-type (WT) and mutant (Mut) V<sub>H</sub>Hs were digested with 100 µg/mL of chymotrypsin or trypsin for 1 h at 37°C and separated by SDS-PAGE. Resistance values were calculated as in Fig. 6. (TIF)

**Figure S6 Correlation between V<sub>H</sub>H protease resistance and the number of theoretical proteolytic cleavage sites.** Linear regression between V<sub>H</sub>H protease resistance and the number of theoretical cleavage sites within the whole V<sub>H</sub>H (“Total

sites”) or within the IMGT-defined CDR regions (“CDR sites”). Wild-type and mutant V<sub>H</sub>H protease resistance values were combined for each protease. The number of protease cleavage sites was determined as in Table S3. Linear regression analysis was used to analyze the correlation coefficient ( $r^2$ ) and significantly non-zero slope of the line (p) in each graph. (TIF)

**Table S1 Primers used in this study.** (PDF)

**Table S2 Onset temperatures ( $T_{onsets}$ ) of wild-type and mutant V<sub>H</sub>Hs.** (PDF)

**Table S3 Theoretical number of protease cleavable sites located within V<sub>H</sub>Hs.** (PDF)

## Acknowledgments

We thank Dae Young Kim for helpful discussions, John Kelly for MS assistance, Sonia Leclerc for DNA sequencing, and Jyothi Kumaran for running the SEC standards. \*This is National Research Council Canada Publication Number 50013.

## Author Contributions

Conceived and designed the experiments: GH RM JT. Performed the experiments: GH TH WD. Analyzed the data: GH TH WD RM JT. Wrote the paper: GH JT.

## References

- Cegelski L, Marshall GR, Eldridge GR, Hultgren SJ (2008) The biology and future prospects of antiviral therapies. *Nat Rev Microbiol* 6: 17–27.
- Clatworthy AE, Pierson E, Hung DT (2007) Targeting virulence: a new paradigm for antimicrobial therapy. *Nat Chem Biol* 3: 541–548.
- Lynch SV, Wiener-Kronish JP (2008) Novel strategies to combat bacterial virulence. *Curr Opin Crit Care* 14: 593–599.
- Svensson A, Larsson A, Emtenäs H, Hedenström M, Fex T, et al. (2001) Design and evaluation of piliocides: potential novel antibacterial agents directed against uropathogenic *Escherichia coli*. *ChemBiochem* 2: 915–918.
- Panchal RG, Hermone AR, Nguyen TL, Wong TY, Schwarzenbacher R, et al. (2004) Identification of small molecule inhibitors of anthrax lethal factor. *Nat Struct Mol Biol* 11: 67–72.
- Shoop WL, Xiong Y, Wiltsie J, Woods A, Guo J, et al. (2005) Anthrax lethal factor inhibition. *Proc Natl Acad Sci U S A* 102: 7958–7963.
- Muschiol S, Bailey L, Gylfe A, Sundin C, Hultenby K, et al. (2006) A small-molecule inhibitor of type III secretion inhibits different stages of the infectious cycle of *Chlamydia trachomatis*. *Proc Natl Acad Sci U S A* 103: 14566–14571.
- Hudson DL, Layton AN, Field TR, Bowen AJ, Wolf-Watz H, et al. (2007) Inhibition of type III secretion in *Salmonella enterica* serovar Typhimurium by small-molecule inhibitors. *Antimicrob Agents Chemother* 51: 2631–2635.
- Lyon GJ, Wright JS, Muir TW, Novick RP (2002) Key determinants of receptor activation in the *agr* autoinducing peptides of *Staphylococcus aureus*. *Biochemistry* 41: 10095–10104.
- Thiagarajah JR, Verkman AS (2005) New drug targets for cholera therapy. *Trends Pharmacol Sci* 26: 172–175.
- Kurtz CB, Cannon EP, Brezzani A, Pitruzzello M, Dinardo C, et al. (2001) GT160-246, a toxin binding polymer for treatment of *Clostridium difficile* colitis. *Antimicrob Agents Chemother* 45: 2340–2347.
- Hinkson PL, Dinardo C, DeCiero D, Klinger JD, Barker RH, Jr. (2008) Televamer, an anionic polymer, neutralizes toxins produced by the BI/027 strains of *Clostridium difficile*. *Antimicrob Agents Chemother* 52: 2190–2195.
- Schneemann A, Manchester M (2009) Anti-toxin antibodies in prophylaxis and treatment of inhalation anthrax. *Future Microbiol* 4: 35–43.
- Strockbine NA, Marques LR, Holmes RK, O'Brien AD (1985) Characterization of monoclonal antibodies against Shiga-like toxin from *Escherichia coli*. *Infect Immun* 50: 695–700.
- Peterson JW, Hejtmancik KE, Markel DE, Craig JP, Kurosky A (1979) Antigenic specificity of neutralizing antibody to cholera toxin. *Infect Immun* 24: 774–779.
- Nowakowski A, Wang C, Powers DB, Amersdorfer P, Smith TJ, et al. (2002) Potent neutralization of botulinum neurotoxin by recombinant oligoclonal antibody. *Proc Natl Acad Sci U S A* 99: 11346–11350.
- Lowy I, Molrine DC, Leav BA, Blair BM, Baxter R, et al. (2010) Treatment with monoclonal antibodies against *Clostridium difficile* toxins. *N Engl J Med* 362: 197–205.
- Kink JA, Williams JA (1998) Antibodies to recombinant *Clostridium difficile* toxins A and B are an effective treatment and prevent relapse of *C. difficile*-associated disease in a hamster model of infection. *Infect Immun* 66: 2018–2025.
- Babcock GJ, Broering TJ, Hernandez HJ, Mandell RB, Donahue K, et al. (2006) Human monoclonal antibodies directed against toxins A and B prevent *Clostridium difficile*-induced mortality in hamsters. *Infect Immun* 74: 6339–6347.
- Hussack G, Arbabi-Ghahroudi M, van Faassen H, Songer JG, Ng KK, et al. (2011) Neutralization of *Clostridium difficile* toxin A with single-domain antibodies targeting the cell receptor binding domain. *J Biol Chem* 286: 8961–8976.
- Hussack G, Tanha J (2010) Toxin-specific antibodies for the treatment of *Clostridium difficile*: current status and future perspectives. *Toxins* 2: 998–1018.
- Bebbington C, Yarranton G (2008) Antibodies for the treatment of bacterial infections: current experience and future prospects. *Curr Opin Biotechnol* 19: 613–619.
- Jank T, Aktories K (2008) Structure and mode of action of clostridial glucosylating toxins: the ABCD model. *Trends Microbiol* 16: 222–229.
- Tjellström B, Stenhammar L, Eriksson S, Magnusson KE (1993) Oral immunoglobulin A supplement in treatment of *Clostridium difficile* enteritis. *Lancet* 341: 701–702.
- Davidson GP, Whyte PB, Daniels E, Franklin K, Nunan H, et al. (1989) Passive immunisation of children with bovine colostrum containing antibodies to human rotavirus. *Lancet* 2: 709–712.
- Tacket CO, Binion SB, Bostwick E, Losonsky G, Roy MJ, et al. (1992) Efficacy of bovine milk immunoglobulin concentrate in preventing illness after *Shigella flexneri* challenge. *Am J Trop Med Hyg* 47: 276–283.
- Tacket CO, Losonsky G, Link H, Hoang Y, Guesry P, et al. (1988) Protection by milk immunoglobulin concentrate against oral challenge with enterotoxigenic *Escherichia coli*. *N Engl J Med* 318: 1240–1243.
- Yokoyama H, Peralta RC, Diaz R, Sando S, Ikemori Y, et al. (1992) Passive protective effect of chicken egg yolk immunoglobulins against experimental enterotoxigenic *Escherichia coli* infection in neonatal piglets. *Infect Immun* 60: 998–1007.
- Reilly RM, Domingo R, Sandhu J (1997) Oral delivery of antibodies. *Future pharmacokinetic trends. Clin Pharmacokinetic* 32: 313–323.
- Hamers-Casterman C, Atarhouch T, Muyldermans S, Robinson G, Hamers C, et al. (1993) Naturally occurring antibodies devoid of light chains. *Nature* 363: 446–448.
- Arbabi Ghahroudi M, Desmyter A, Wyns L, Hamers R, Muyldermans S (1997) Selection and identification of single domain antibody fragments from camel heavy-chain antibodies. *FEBS Lett* 414: 521–526.

32. Wesolowski J, Alzogaray V, Reyelt J, Unger M, Juarez K, et al. (2009) Single domain antibodies: promising experimental and therapeutic tools in infection and immunity. *Med Microbiol Immunol* 198: 157–174.
33. Harmsen MM, van Solt CB, Hoogendoorn A, van Zijderveld FG, Niewold TA, et al. (2005) *Escherichia coli* F4 fimbriae specific llama single-domain antibody fragments effectively inhibit bacterial adhesion *in vitro* but poorly protect against diarrhoea. *Vet Microbiol* 111: 89–98.
34. Krüger C, Hultberg A, Marcotte H, Hermans P, Bezemer S, et al. (2006) Therapeutic effect of llama derived VHH fragments against *Streptococcus mutans* on the development of dental caries. *Appl Microbiol Biotechnol* 72: 732–737.
35. van der Vaart JM, Pant N, Wolvers D, Bezemer S, Hermans PW, et al. (2006) Reduction in morbidity of rotavirus induced diarrhoea in mice by yeast produced monovalent llama-derived antibody fragments. *Vaccine* 24: 4130–4137.
36. Young NM, MacKenzie CR, Narang SA, Oomen RP, Baenziger JE (1995) Thermal stabilization of a single-chain Fv antibody fragment by introduction of a disulphide bond. *FEBS Lett* 377: 135–139.
37. Hagihara Y, Mine S, Uegaki K (2007) Stabilization of an immunoglobulin fold domain by an engineered disulfide bond at the buried hydrophobic region. *J Biol Chem* 282: 36489–36495.
38. Saerens D, Conrath K, Govaert J, Muyldermans S (2008) Disulfide bond introduction for general stabilization of immunoglobulin heavy-chain variable domains. *J Mol Biol* 377: 478–488.
39. Gong R, Vu BK, Feng Y, Prieto DA, Dyba MA, et al. (2009) Engineered human antibody constant domains with increased stability. *J Biol Chem* 284: 14203–14210.
40. Wörn A, Plückthun A (1998) Mutual stabilization of V<sub>L</sub> and V<sub>H</sub> in single-chain antibody fragments, investigated with mutants engineered for stability. *Biochemistry* 37: 13120–13127.
41. Sieber V, Plückthun A, Schmid FX (1998) Selecting proteins with improved stability by a phage-based method. *Nat Biotechnol* 16: 955–960.
42. Jung S, Honegger A, Plückthun A (1999) Selection for improved protein stability by phage display. *J Mol Biol* 294: 163–180.
43. Jermutus L, Honegger A, Schwesinger F, Hanes J, Plückthun A (2001) Tailoring *in vitro* evolution for protein affinity or stability. *Proc Natl Acad Sci U S A* 98: 75–80.
44. Matsuura T, Plückthun A (2003) Selection based on the folding properties of proteins with ribosome display. *FEBS Lett* 539: 24–28.
45. Famm K, Hansen L, Christ D, Winter G (2008) Thermodynamically stable aggregation-resistant antibody domains through directed evolution. *J Mol Biol* 376: 926–931.
46. Famm K, Winter G (2006) Engineering aggregation-resistant proteins by directed evolution. *Protein Eng Des Sel* 19: 479–481.
47. Christ D, Famm K, Winter G (2007) Repertoires of aggregation-resistant human antibody domains. *Protein Eng Des Sel* 20: 413–416.
48. Jespers L, Schon O, Famm K, Winter G (2004) Aggregation-resistant domain antibodies selected on phage by heat denaturation. *Nat Biotechnol* 22: 1161–1165.
49. Harmsen MM, van Solt CB, van Zijderveld-van Bommel AM, Niewold TA, van Zijderveld FG (2006) Selection and optimization of proteolytically stable llama single-domain antibody fragments for oral immunotherapy. *Appl Microbiol Biotechnol* 72: 544–551.
50. Chan PH, Pardon E, Menzer L, De Genst E, Kumita JR, et al. (2008) Engineering a camelid antibody fragment that binds to the active site of human lysozyme and inhibits its conversion into amyloid fibrils. *Biochemistry* 47: 11041–11054.
51. Arbabi-Ghahroudi M, MacKenzie R, Tanha J (2009) Selection of non-aggregating V<sub>H</sub> binders from synthetic V<sub>H</sub> phage-display libraries. *Methods Mol Biol* 525: 187–216, xiii.
52. Ho SN, Hunt HD, Horton RM, Pullen JK, Pease LR (1989) Site-directed mutagenesis by overlap extension using the polymerase chain reaction. *Gene* 77: 51–59.
53. Arbabi-Ghahroudi M, Mackenzie R, Tanha J (2010) Site-directed mutagenesis for improving biophysical properties of V<sub>H</sub> domains. *Methods Mol Biol* 634: 309–330.
54. Greenfield NJ (2006) Using circular dichroism spectra to estimate protein secondary structure. *Nat Protoc* 1: 2876–2890.
55. Greenfield NJ (2006) Analysis of the kinetics of folding of proteins and peptides using circular dichroism. *Nat Protoc* 1: 2891–2899.
56. Bordoli L, Kiefer F, Arnold K, Benkert P, Battey J, et al. (2009) Protein structure homology modeling using SWISS-MODEL workspace. *Nat Protoc* 4: 1–13.
57. Spinelli S, Frenken LG, Hermans P, Verrips T, Brown K, et al. (2000) Camelid heavy-chain variable domains provide efficient combining sites to haptens. *Biochemistry* 39: 1217–1222.
58. Saerens D, Kinne J, Bosmans E, Wernery U, Muyldermans S, et al. (2004) Single domain antibodies derived from dromedary lymph node and peripheral blood lymphocytes sensing conformational variants of prostate-specific antigen. *J Biol Chem* 279: 51965–51972.
59. Wu SL, Jiang H, Lu Q, Dai S, Hancock WS, et al. (2009) Mass spectrometric determination of disulfide linkages in recombinant therapeutic proteins using online LC-MS with electron-transfer dissociation. *Anal Chem* 81: 112–122.
60. Dumoulin M, Conrath K, Van Meirhaeghe A, Meersman F, Heremans K, et al. (2002) Single-domain antibody fragments with high conformational stability. *Protein Sci* 11: 500–515.
61. To R, Hiramata T, Arbabi-Ghahroudi M, MacKenzie R, Wang P, et al. (2005) Isolation of monomeric human V<sub>H</sub>s by a phage selection. *J Biol Chem* 280: 13955–13960.
62. Wang W, Nema S, Teagarden D (2010) Protein aggregation—pathways and influencing factors. *Int J Pharm* 390: 89–99.
63. Hubbard SJ, Beynon RJ, Thornton JM (1998) Assessment of conformational parameters as predictors of limited proteolytic sites in native protein structures. *Protein Eng* 11: 349–359.
64. Frenken LG, Egmond MR, Batenburg AM, Verrips CT (1993) *Pseudomonas glumae* lipase: increased proteolytic stability by protein engineering. *Protein Eng* 6: 637–642.
65. Balan KK, Jones AT, Roberts NB, Pearson JP, Critchley M, et al. (1996) The effects of *Helicobacter pylori* colonization on gastric function and the incidence of portal hypertensive gastropathy in patients with cirrhosis of the liver. *Am J Gastroenterol* 91: 1400–1406.
66. Schmidt P, Wiedemann V, Kühlmann R, Wanke R, Linckh E, et al. (1989) Chicken egg antibodies for prophylaxis and therapy of infectious intestinal diseases. II. *In vitro* studies on gastric and enteric digestion of egg yolk antibodies specific against pathogenic *Escherichia coli* strains. *Zentralbl Veterinarmed B* 36: 619–628.
67. Amorij JP, Hinrichs W, Frijlink HW, Wilschut JC, Huckriede A (2010) Needle-free influenza vaccination. *Lancet Infect Dis* 10: 699–711.
68. Werle M, Makhlof A, Takeuchi H (2009) Oral protein delivery: a patent review of academic and industrial approaches. *Recent Pat Drug Deliv Formul* 3: 94–104.
69. Li S, Zheng W, Kuolee R, Hiramata T, Henry M, et al. (2009) Pentabody-mediated antigen delivery induces antigen-specific mucosal immune response. *Mol Immunol* 46: 1718–1726.
70. Kim DY, Ding W, Tanha J (2011) Solubility and stability engineering of human V<sub>H</sub> domains. *Methods Mol Biol*; (In press).
